# Supplementary material for: Untargeted metabolomic profiling of Sphagnum fallax reveals novel antimicrobial metabolites
Source: PubMed Central journal article supplement (PMC6848953; doi:10.1002/pld3.179), 2019-11-12
Supplement: PLD3-3-e00179-s001.pdf [file PLD3-3-e00179-s001.pdf]

## Supporting Information

Article title: Untargeted metabolic profiling of *Sphagnum fallax* from boreal peatlands identifies antimicrobial compounds and novel metabolites

Authors: Jane D. Fudyma<sup>1</sup>, Jamee Lyon<sup>1</sup>, Roya AminiTabrizi<sup>1</sup>, Hans Gieschen<sup>1</sup>, Rosalie Chu<sup>2</sup>, David W. Hoyt<sup>2</sup>, Jennifer E. Kyle<sup>3</sup>, Jason Toyoda<sup>2</sup>, Nikola Tolic<sup>2</sup>, Heino M. Heyman<sup>4</sup>, Nancy Hess<sup>2</sup>, Thomas O. Metz<sup>3</sup>, Malak M. Tfaily<sup>1,2\*</sup>

**Fig. S1** Complete workflow of LC/MS FTICR-MS data processing and analysis.

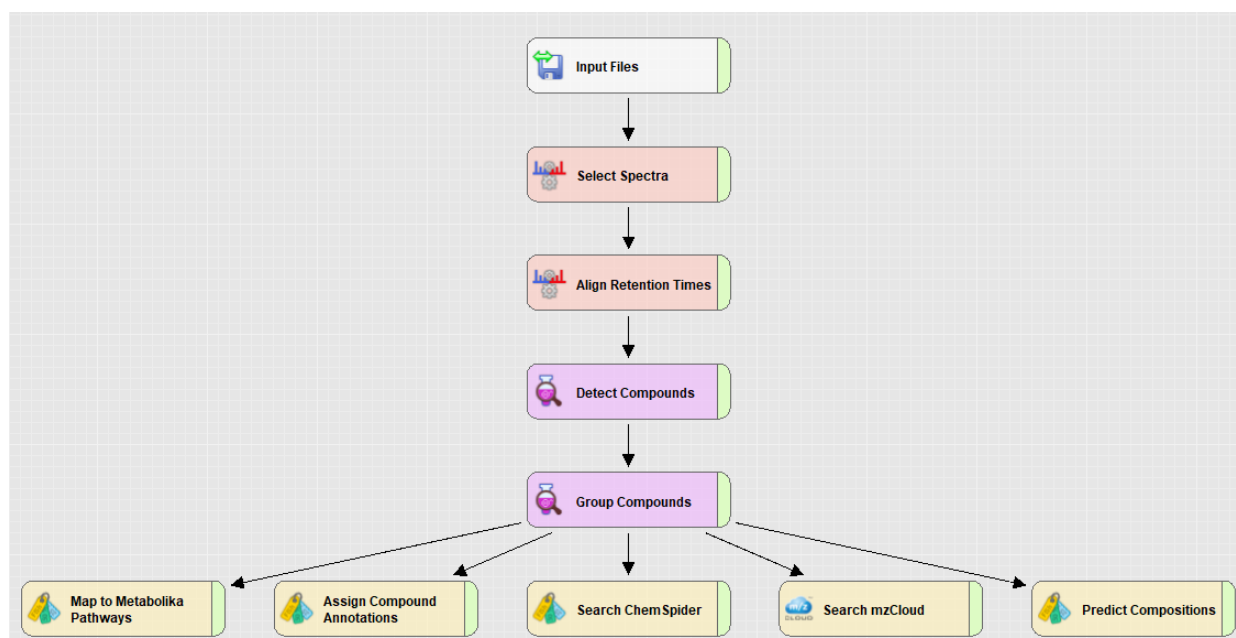

**Table S1.** A list of the average chemical shifts per identified metabolite is listed in Table is included in Table S1. m- multiplet, s- singlet, d, doublet, t-triplet, q- quartet, dd- doublet of doublets, dt-doublet of triplets

| Metabolite            | List of average chemical shifts (1H NMR)                                                                                            |
|-----------------------|-------------------------------------------------------------------------------------------------------------------------------------|
| 3-<br>Hydroxybutyrate | 1.20(d)                                                                                                                             |
| 4-<br>Aminobutyrate   | 3.01(m), 2.30(t), 1.9(dt)                                                                                                           |
| Acetate               | 1.95(s)                                                                                                                             |
| Alanine               | 3.78(q), 1.47(d)                                                                                                                    |
| Asparagine            | 4.00(dd), 2.95(dd), 2.85(dd)                                                                                                        |
| Aspartate             | 3.89(dd), 2.82(dd), 2.67(dd)                                                                                                        |
| Choline               | 4.06(m), 3.51(m), 3.19(s)                                                                                                           |
| Dimethylamine         | 2.72(s)                                                                                                                             |
| Formate               | 8.44(s)                                                                                                                             |
| Fructose              | 4.11(dd), 4.10(dd), 4.01(dd), 3.99(m), 3.89(dd), 3.82(m), 3.79(dd), 3.78(d), 3.71(d), 3.70(dd), 3.67(dd), 3.59(d), 3.55(d), 3.54(d) |
| Fumarate              | 6.52(s)                                                                                                                             |
| Glucose               | 5.22(d), 4.64(d), 3.89(dd), 3.84(m), 3.82(m), 3.76(dd), 3.72(dd), 3.71(m), 3.52(dd), 3.48(t), 3.45(m), 3.40(dd), 3.39(dd), 3.23(dd) |
| Glycerol              | 3.77(m), 3.64(dd), 3.55(dd)                                                                                                         |
| Isoleucine            | 3.66(d), 1.97(m), 1.45(m), 1.25(m), 1.00(d), 0.93(t)                                                                                |
| Lactate               | 4.10(q), 1.32(d)                                                                                                                    |
| Leucine               | 3.73(dd), 1.74(m), 1.70(m), 1.67(m), 0.96(d), 0.95(d)                                                                               |
| Malate                | 4.32(dd), 2.72(dd), 2.45(dd)                                                                                                        |
| Methanol              | 3.35(s)                                                                                                                             |
| Methylamine           | 2.60(s)                                                                                                                             |
| O-<br>Phosphocholine  | 4.16(m), 3.58(m), 3.21(s)                                                                                                           |
| Phenylalanine         | 7.42(m), 7.37(ttt), 7.32(m), 3.99(dd), 3.28(dd), 3.11(dd)                                                                           |
| Propylene glycol      | 1.13(d)                                                                                                                             |
| Pyruvate              | 2.36(s)                                                                                                                             |
| Quinone               | 6.80(s)                                                                                                                             |
| Sucrose               | 5.40(d), 4.21(d), 4.04(t), 3.88(m), 3.83(m), 3.82(dd), 3.82(d), 3.81(m), 3.80(m), 3.76(dd), 3.67(s), 3.66(s), 3.55(dd), 3.47(dd)    |
| Threonine             | 4.25(dq), 3.58(d), 1.32(d)                                                                                                          |
| Uridine               | 7.90(d), 5.90(d), 5.89(d), 4.34(dd), 4.20(t), 4.12(m), 3.90(dd), 3.80(dd)                                                           |
| Valine                | 3.60(d), 2.26(m), 1.03(d), 0.98(d)                                                                                                  |
| myo-Inositol          | 4.05(t), 3.61(dd), 3.52(dd), 3.27(t)                                                                                                |

**Table S2.** KEGG pathways associated with *Sphagnum* metabolism based on metabolites detected in *Sphagnum* via  $^1\text{H}$  NMR. The number between parenthesis reflect the number of metabolites that mapped the pathway. Here we limited pathways that had at least 3 metabolites detected via  $^1\text{H}$  NMR

| <b>KEGG Biological Pathway and ID</b>                     | <b>Metabolite Associated</b> |
|-----------------------------------------------------------|------------------------------|
| ec01100 Metabolic pathways (27)                           |                              |
| ec01120 Microbial metabolism in diverse environments (15) |                              |
| ec01110 Biosynthesis of secondary metabolites (12)        |                              |
| ec01130 Biosynthesis of antibiotics (11)                  |                              |
| ec00970 Aminoacyl-tRNA biosynthesis (8)                   |                              |
| ec00250 Alanine, aspartate and glutamate metabolism (6)   |                              |
| ec00680 Methane metabolism (6)                            |                              |
| ec00052 Galactose metabolism (5)                          |                              |
| ec00290 Valine, leucine and isoleucine biosynthesis (5)   |                              |
| ec00460 Cyanoamino acid metabolism (5)                    |                              |
| ec00620 Pyruvate metabolism (5)                           |                              |
| ec00260 Glycine, serine and threonine metabolism (4)      |                              |
| ec00720 Carbon fixation pathways in prokaryotes (4)       |                              |
| ec00760 Nicotinate and nicotinamide metabolism (4)        |                              |
| ec00640 Propanoate metabolism (4)                         |                              |
| ec00966 Glucosinolate biosynthesis (4)                    |                              |
| ec00010 Glycolysis / Gluconeogenesis (4)                  |                              |
| ec00650 Butanoate metabolism (4)                          |                              |
| ec00261 Monobactam biosynthesis (3)                       |                              |
| ec00770 Pantothenate and CoA biosynthesis (3)             |                              |
| ec00280 Valine, leucine and isoleucine degradation (3)    |                              |
| ec00430 Taurine and hypotaurine metabolism (3)            |                              |
| ec00630 Glyoxylate and dicarboxylate metabolism (3)       |                              |
| ec00710 Carbon fixation in photosynthetic organisms (3)   |                              |
| ec00270 Cysteine and methionine metabolism (3)            |                              |
| ec00360 Phenylalanine metabolism (3)                      |                              |
| ec00500 Starch and sucrose metabolism (3)                 |                              |

**Table S3.** Secondary metabolites identified by LC FTICR-MS/MS (positive ion mode) and validated by predicted composition and/or ChemSpider, where unknown compounds were generated a similarity compound based on mzCloud simulation. Compounds with a star are known fungal metabolites.

| Class                                       | Name                                                                                                                                                                                                                                | Formula          | mzCloud Search | mzCloud Sim. | Predicted Compositions | ChemSpider      | Molecular Weight | RT [min] |
|---------------------------------------------|-------------------------------------------------------------------------------------------------------------------------------------------------------------------------------------------------------------------------------------|------------------|----------------|--------------|------------------------|-----------------|------------------|----------|
| steroid alcohol*                            | Ergosterol                                                                                                                                                                                                                          | C28 H44 O        | Full match     |              | Full match             | Full match      | 396.339          | 51.485   |
| Dehydroergosterol*                          | Dehydroergosterol                                                                                                                                                                                                                   | C28 H42 O        | Full match     |              | Full match             | Full match      | 394.324          | 50.675   |
| ergoline alkaloids*                         | (8beta)-6-Allyl-N-[3-(dimethylamino)propyl]ergoline-8-Carbohydrateoxamide                                                                                                                                                           | C23 H32 N4 O     | 77.9           |              | Full match             | Not the top hit | 380.256          | 41.587   |
| Carbohydrateoxylate/Carbohydrateoxylic acid | 2-Methyl-2-propanyl 4-fluoro-4-(hydroxymethyl)-1-piperidineCarbohydrateoxylate                                                                                                                                                      | C11 H20 F N O3   | 72.9           |              | Full match             | Not the top hit | 233.142          | 30.951   |
| Carbohydrateoxylate/Carbohydrateoxylic acid | 2-[(Allyloxy)Carbohydrateonyl]-8-(tert-butoxyCarbohydrateonyl)-2,8-diazaspiro[4,5]decane-3-Carbohydrateoxylic acid                                                                                                                  | C18 H28 N2 O6    | 70.4           |              | Full match             | Not the top hit | 368.197          | 37.068   |
| Amine                                       | 3-(2-{2-[(2-Heptylundecyloxy)ethoxy]ethoxy}-1-propanamine                                                                                                                                                                           | C25 H53 N O3     |                |              | Full match             | Full match      | 415.403          | 50.525   |
| Acid                                        | 5-(Benzoyloxy)-2-hexyl-3-hydroxyhexadecanoic acid                                                                                                                                                                                   | C29 H50 O4       |                |              | Full match             | Full match      | 462.371          | 55.441   |
| Alcohol                                     | 1,1'-(Octadecylimino)dipropen-2-ol                                                                                                                                                                                                  | C24 H48 O2       |                |              | Full match             | Full match      | 385.392          | 49.481   |
| stearate                                    | 253MCOPOYV                                                                                                                                                                                                                          | C24 H48 O6       |                |              | Full match             | Full match      | 432.345          | 45.707   |
| Amino acid                                  | Ethyl O-methyl-3-nitro-N-tetradecanoyl-L-tyrosinate                                                                                                                                                                                 | C26 H42 N2 O6    |                |              | Full match             | Full match      | 478.304          | 40.462   |
| cholesterol ester                           | (-)-Cholesteryl acetate                                                                                                                                                                                                             | C29 H48 O2       |                |              | Full match             | Full match      | 428.365          | 56.737   |
| Carbohydrateamantes                         | Ethyl [5-amino-3-(4-aminophenyl)-1,2-dihydropyrido[3,4-b]pyrazin-7-yl]Carbohydrateamate                                                                                                                                             | C16 H18 N6 O2    |                |              | Full match             | Full match      | 326.148          | 15.902   |
| Amine                                       | 3-(2-{2-[(2-Heptylundecyloxy)ethoxy]ethoxy}-1-propanamine                                                                                                                                                                           | C25 H53 N O3     |                |              | Full match             | Full match      | 415.403          | 49.512   |
| Quinone                                     | 1,4-Bis[[2-(1-piperazinyl)ethyl]amino]-9,10-anthraquinone                                                                                                                                                                           | C26 H34 N6 O2    | 89.4           |              | Full match             | Full match      | 462.275          | 49.866   |
| cannabinoid                                 | 5-CHLORO-AB-PINACA                                                                                                                                                                                                                  | C18 H25 Cl N4 O2 |                |              | Full match             | Full match      | 364.165          | 34.33    |
| nucleoside                                  | Sdz-wag-994                                                                                                                                                                                                                         | C17 H25 N5 O4    |                |              | Full match             | Full match      | 363.189          | 12.592   |
| Aromatic                                    | 3,4-Dihydro-2H,11bH-spiro[phthalazino[2,1-a][3,1]benzoxazine-13,5'-pyrimidine]-1,2,4,6'(1'H,2'H,3'H)-tetrone                                                                                                                        | C18 H14 N4 O5    |                |              | Full match             | Full match      | 366.095          | 25.586   |
| Amine                                       | 5-Heptylundecyl[quinazoline-1,5-diamine                                                                                                                                                                                             | C19 H24 N4       |                |              | Full match             | Full match      | 308.199          | 38.037   |
| Sugar                                       | Methyl (5R)-5-[(1R,2R)-2-hydroxy-1-[(4R)-1-methyl-4-propyl-L-prolyl]amino]propyl]-2,3-O-(oxomethylene)-1-thio-beta-L-arabinopyranoside                                                                                              | C19 H32 N2 O7 S  |                |              | Full match             | Full match      | 432.192          | 34.431   |
| Aromatic                                    | 8-[4-(3,4-Difluorophenyl)-3-cyclohexen-1-yl]-1,4-dioxaspiro[4,5]decane                                                                                                                                                              | C20 H24 F2 O2    |                |              | Full match             | Full match      | 334.176          | 38.707   |
| Amine                                       | N-[1-(4-Benzyl-1-piperazinyl)-2-propanyl]-2-pyridinamine                                                                                                                                                                            | C19 H26 N4       |                |              | Full match             | Full match      | 310.214          | 38.858   |
| Other                                       | Ethyl [(3-benzyl-4-oxo-4,6-dihydro-3H-spiro[benzo[h]quinazoline-5,1'-cyclohexan]-2-yl)sulfanyl]acetate                                                                                                                              | C28 H30 N2 O3 S  |                |              | Full match             | Full match      | 474.198          | 31.141   |
| acetamide                                   | Capsi-amide                                                                                                                                                                                                                         | C17 H35 N O      |                |              | Full match             | Full match      | 269.272          | 49.356   |
| Other                                       | Nipradiol                                                                                                                                                                                                                           | C15 H22 N2 O6    |                |              | Full match             | Full match      | 326.148          | 19.935   |
| Amine                                       | (E)-N-[2-[(5-[(Dimethylnitro)yl]methyl)-2-furyl]methyl]sulfany]ethyl]-N'-methyl-2-nitro-1,1-ethenediamine                                                                                                                           | C13 H22 N4 O5 S  |                |              | Full match             | Full match      | 346.13           | 30.972   |
| Benzene                                     | 2-(3,5-Dimethoxy-4-nitrophenoxy)-1,3,5-trimethoxy-4-nitrobenzene                                                                                                                                                                    | C17 H18 N2 O10   |                |              | Full match             | Full match      | 410.098          | 26.199   |
| Steroid                                     | 4,4-Difluoropreg-5-ene-3,20-dione                                                                                                                                                                                                   | C21 H28 F2 O2    |                |              | Full match             | Full match      | 350.207          | 35.925   |
| Quinone                                     | 5-O-methyl embelin                                                                                                                                                                                                                  | C18 H28 O4       |                |              | Full match             | Full match      | 308.199          | 37.327   |
|                                             | 2210856                                                                                                                                                                                                                             | C18 H32 O2       |                |              | Full match             | Full match      | 280.24           | 50.663   |
| Other                                       | 2,6-Diamino-5-[6-hydroxy-6-(1,3-oxazol-2-yl)hexyl]-4(1H)-pyrimidinone                                                                                                                                                               | C13 H19 N5 O2    |                |              | Full match             | Full match      | 293.147          | 2.814    |
| Amine                                       | 4-[Bis(ethylsulfanyl)methyl]-N,N-dimethylaniline                                                                                                                                                                                    | C13 H21 N S2     |                |              | Full match             | Full match      | 255.111          | 4.963    |
|                                             | IN00216                                                                                                                                                                                                                             | C14 H13 N O4     |                |              | Full match             | Full match      | 259.084          | 18.496   |
|                                             | KJ9800000                                                                                                                                                                                                                           | C18 H39 O7 P     |                |              | Full match             | Full match      | 398.243          | 44.667   |
| anthelmintic peptide                        | 1-BOC-4-(2-hydroxyethyl)piperazine                                                                                                                                                                                                  | C11 H22 N2 O3    |                |              | Full match             | Full match      | 230.163          | 10.912   |
| Other                                       | Leu-Leu                                                                                                                                                                                                                             | C12 H24 N2 O3    |                |              | Full match             | Full match      | 244.179          | 13.46    |
| Acid                                        | 3-(1-Phenyl-1H-pyrazol-5-yl)-1,2,3-benzotriazin-4(3H)-one                                                                                                                                                                           | C16 H11 N5 O     |                |              | Full match             | Full match      | 289.095          | 10.256   |
|                                             | tert-Butyl 2,7-diazaspiro[4.4]nonane-2-Carbohydrateoxylate                                                                                                                                                                          | C12 H22 N2 O2    |                |              | Full match             | Full match      | 226.168          | 9.733    |
| Unknown                                     | [Similar to: (1S,2S,8S,9S,16a,17E)-2,16,20-Trihydroxy-9,10,14-trimethyl-11,22-dioxo-4,9-cyclo-9,10-secocholesta-5,25-dien-1-yl beta-D-glucopyranoside; ΔMass: 198.2945 Da]                                                          |                  | 65             |              | Full match             |                 | 466.088          | 18.097   |
| Unknown                                     | [Similar to: Docosapentaenoic acid; ΔMass: -17.9144 Da]                                                                                                                                                                             |                  | 72.5           |              | Full match             |                 | 348.17           | 38.445   |
| Unknown                                     | [Similar to: Chromomycin A3; ΔMass: 572.2663 Da]                                                                                                                                                                                    |                  | 75.5           |              | Full match             |                 | 610.243          | 48.711   |
| Unknown                                     | [Similar to: Eicosatetraenoic acid; ΔMass: -1.9501 Da]                                                                                                                                                                              |                  | 63             |              | Full match             |                 | 298.128          | 2.426    |
| Unknown                                     | [Similar to: DAUDA; ΔMass: -174.0058 Da]                                                                                                                                                                                            |                  | 79.5           |              | Full match             |                 | 608.23           | 21.366   |
| Unknown                                     | [Similar to: (2S,3R,4R,5S,6E,14S)-4-Acetoxy-2-ammonio-3,5,14-trihydroxy-6-icosenoate; ΔMass: 54.0469 Da]                                                                                                                            |                  | 66             |              | Full match             |                 | 377.241          | 20.205   |
| Unknown                                     | [Similar to: MDMB-FUBINACA; ΔMass: -17.9863 Da]                                                                                                                                                                                     |                  | 69.3           |              | Full match             |                 | 415.167          | 16.557   |
| Unknown                                     | [Similar to: DAUDA; ΔMass: 22.0896 Da]                                                                                                                                                                                              |                  | 63             |              | Full match             |                 | 412.134          | 16.455   |
| Unknown                                     | [Similar to: Penta-N-acetylchitopentaose; ΔMass: 609.3279 Da]                                                                                                                                                                       |                  | 67.4           |              | Full match             |                 | 424.08           | 20.524   |
| Unknown                                     | [Similar to: 6,18,19-Trihydroxytrachyloban-2-one; ΔMass: 0.0388 Da]                                                                                                                                                                 |                  | 79.5           |              | Full match             |                 | 334.176          | 38.836   |
| Unknown                                     | [Similar to: 9-Nitrooleate; ΔMass: -23.9120 Da]                                                                                                                                                                                     |                  | 79.5           |              | Full match             |                 | 351.153          | 2.234    |
| Unknown                                     | [Similar to: Docosahexaenoic acid ethyl ester; ΔMass: -20.0415 Da]                                                                                                                                                                  |                  | 68             |              | Full match             |                 | 376.313          | 49.537   |
| Unknown                                     | [Similar to: Nervonic acid methyl ester; ΔMass: 14.2209 Da]                                                                                                                                                                         |                  | 76.9           |              | Full match             |                 | 366.145          | 34.348   |
| Unknown                                     | [Similar to: Perillartine; ΔMass: -99.0320 Da]                                                                                                                                                                                      |                  | 85.2           |              | Full match             |                 | 264.147          | 14.488   |
| Unknown                                     | [Similar to: 2,4-Bis(2,4-dimethylphenyl)-6-(2-hydroxy-4-n-octyloxyphenyl)-1,3,5-triazine; ΔMass: 244.1881 Da]                                                                                                                       |                  | 96.8           |              | Full match             |                 | 265.116          | 1.325    |
| Unknown                                     | [Similar to: Nervonic acid methyl ester; ΔMass: 14.1845 Da]                                                                                                                                                                         |                  | 76.9           |              | Full match             |                 | 366.181          | 34.409   |
| Unknown                                     | [Similar to: Naringin dihydrochalcone; ΔMass: 123.0445 Da]                                                                                                                                                                          |                  | 84.8           |              | Full match             |                 | 459.15           | 11.399   |
| Unknown                                     | [Similar to: N2-(2-Benzoylphenyl)-1-benzylpyrrolidine-2-Carbohydrateoxamide; ΔMass: -40.0008 Da]                                                                                                                                    |                  | 76.6           |              | Full match             |                 | 424.185          | 18.107   |
| Unknown                                     | [Similar to: Dapsone; ΔMass: -171.8047 Da]                                                                                                                                                                                          |                  | 85.3           |              | Full match             |                 | 419.867          | 1.318    |
| Unknown                                     | [Similar to: 1-O-(1,3,23,24,25-Pentahydroxy-28-oxo-9,19-cyclolanostan-28-yl)hexopyranose; ΔMass: 270.2066 Da]                                                                                                                       |                  | 65.3           |              | Full match             |                 | 414.202          | 21.28    |
| Unknown                                     | [Similar to: AL 8810; ΔMass: 38.0344 Da]                                                                                                                                                                                            |                  | 67.7           |              | Full match             |                 | 364.186          | 32.418   |
| Unknown                                     | [Similar to: 15-Deoxy-Δ12,14-prostaglandin A1; ΔMass: 28.1040 Da]                                                                                                                                                                   |                  | 70.9           |              | Full match             |                 | 290.115          | 25.55    |
| Unknown                                     | [Similar to: Linoleic acid-biotin; ΔMass: -27.8978 Da]                                                                                                                                                                              |                  | 78.2           |              | Full match             |                 | 548.242          | 51.729   |
| Unknown                                     | [Similar to: Obacunone; ΔMass: 0.0902 Da]                                                                                                                                                                                           |                  | 62.4           |              | Full match             |                 | 454.109          | 1.343    |
| Unknown                                     | [Similar to: (2S,3R,4R,5S,6E,14S)-4-Acetoxy-2-ammonio-3,5,14-trihydroxy-6-icosenoate; ΔMass: 54.0469 Da]                                                                                                                            |                  | 64             |              | Full match             |                 | 377.241          | 18.843   |
| Unknown                                     | [Similar to: 4,4'-Methylenebis(3-chloro-2,6-diethylaniline); ΔMass: 137.0679 Da]                                                                                                                                                    |                  | 82.3           |              | Full match             |                 | 241.095          | 2.228    |
| Unknown                                     | [Similar to: Ergosterol peroxide; ΔMass: 196.3153 Da]                                                                                                                                                                               |                  | 75             |              | Full match             |                 | 232.014          | 26.204   |
| Unknown                                     | [Similar to: (3β,5α,9α,16α,21β,22α)-28-Acetoxy-16,22,24-trihydroxy-21-[(1E)-2-methyl-2-buteno]loxy]olean-12-en-3-yl beta-D-glucopyranosyl-(1->2)-beta-D-glucopyranosyl-(1->4)-beta-D-glucopyranosiduronic acid; ΔMass: 522.2872 Da] |                  | 85             |              | Full match             |                 | 608.264          | 50.559   |
| Unknown                                     | [Similar to: Andrographiside; ΔMass: 144.0656 Da]                                                                                                                                                                                   |                  | 61.9           |              | Full match             |                 | 368.197          | 37.865   |
| Unknown                                     | [Similar to: Maslinic acid; ΔMass: -35.8581 Da]                                                                                                                                                                                     |                  | 79.7           |              | Full match             |                 | 508.213          | 21.615   |
| Unknown                                     | [Similar to: CAY10401; ΔMass: 0.1720 Da]                                                                                                                                                                                            |                  | 74.3           |              | Full match             |                 | 382.09           | 23.027   |
| Unknown                                     | [Similar to: (1R,2S,5aR,5bR,7aS,10R,12bR)-2-Hydroxy-10-isopropenyl-3,3a,5b,12b-                                                                                                                                                     |                  | 65.7           |              | Full match             |                 | 503.258          | 21.617   |

|         |                                                                                                                                                                                                                                             |      |            |         |        |
|---------|---------------------------------------------------------------------------------------------------------------------------------------------------------------------------------------------------------------------------------------------|------|------------|---------|--------|
| Unknown | pentamethyloctadecahydrocyclopenta[ <i>a</i> ]phenanthrene-1,7a(1H)-diCarbohydrateoxylic acid; ΔMass: -16.9234 Da                                                                                                                           | 66   | Full match | 548.243 | 51.342 |
| Unknown | [Similar to: Linoleic acid-biotin; ΔMass: -27.8978 Da]                                                                                                                                                                                      | 85.5 | Full match | 391.221 | 18.556 |
| Unknown | [Similar to: AB-CHMINACA metabolite M3A; ΔMass: -18.0205 Da]                                                                                                                                                                                | 78.3 | Full match | 486.192 | 34.259 |
| Unknown | [Similar to: 1-O-[3-[(6-Deoxyhexopyranosyloxy)-27-hydroxy-27,28-dioxoolean-12-en-28-yl]hexopyranose; ΔMass: 308.2535 Da]                                                                                                                    | 89.5 | Full match | 391.221 | 18.44  |
| Unknown | [Similar to: AB-CHMINACA metabolite M3A; ΔMass: -18.0205 Da]                                                                                                                                                                                | 62.4 | Full match | 353.163 | 30.878 |
| Unknown | [Similar to: Halplamine; ΔMass: -96.0575 Da]                                                                                                                                                                                                | 66.2 | Full match | 428.229 | 37.444 |
| Unknown | [Similar to: 14(S)-HDHA; ΔMass: -83.9937 Da]                                                                                                                                                                                                | 71.5 | Full match | 329.053 | 2.878  |
| Unknown | [Similar to: Adenosine diphosphate (ADP); ΔMass: 97.9769 Da]                                                                                                                                                                                | 79.6 | Full match | 464.29  | 50.535 |
| Unknown | [Similar to: 14(S)-HDHA; ΔMass: -120.0553 Da]                                                                                                                                                                                               | 95.8 | Full match | 273.085 | 1.806  |
| Unknown | [Similar to: Eicosapentaenoic acid methyl ester; ΔMass: 43.1553 Da]                                                                                                                                                                         | 63.9 | Full match | 296.137 | 15.247 |
| Unknown | [Similar to: (2E,4E,9Z)-1-(piperidin-1-yl)hexadeca-2,4,9-trien-1-one; ΔMass: 21.1346 Da]                                                                                                                                                    | 60.9 | Full match | 362.15  | 36.857 |
| Unknown | [Similar to: Docosapentaenoic acid methyl ester; ΔMass: -17.8781 Da]                                                                                                                                                                        | 77.2 | Full match | 391.2   | 30.445 |
| Unknown | [Similar to: AB-CHMINACA metabolite M3A; ΔMass: -17.9994 Da]                                                                                                                                                                                | 75.6 | Full match | 476.29  | 50.781 |
| Unknown | [Similar to: 16,16-Dimethyl prostaglandin A1; ΔMass: -112.0291 Da]                                                                                                                                                                          | 65.1 | Full match | 710.37  | 35.503 |
| Unknown | [Similar to: CAY10401; ΔMass: -328.1080 Da]                                                                                                                                                                                                 | 82.3 | Full match | 294.22  | 37.432 |
| Unknown | [Similar to: Norsufentanil; ΔMass: -18.0357 Da]                                                                                                                                                                                             | 63   | Full match | 368.197 | 37.462 |
| Unknown | [Similar to: 1-O-[5-(3,5-Dihydroxydecanoyloxy)-3-hydroxydecanoyloxy]-3-hydroxydecanoyl]hexitol; ΔMass: 372.2593 Da]                                                                                                                         | 63.5 | Full match | 514.148 | 29.326 |
| Unknown | [Similar to: (4R,9β,23E)-2-(β-D-Glucopyranosyloxy)-16,20-dihydroxy-9,10,14-trimethyl-1,11,22-trioxo-4,9-cyclo-9,10-secocholesta-2,5,23-trien-25-yl acetate; ΔMass: 204.2087 Da]                                                             | 66.3 | Full match | 330.181 | 42.119 |
| Unknown | [Similar to: all-cis-4,7,10,13,16-Docosapentaenoic acid; ΔMass: 0.0751 Da]                                                                                                                                                                  | 63.8 | Full match | 710.37  | 35.937 |
| Unknown | [Similar to: (6aR,9R,9aR)-9-Acetyl-3-[(1E,3E,5S)-3,5-dimethyl-1,3-heptadien-1-yl]-6a-methyl-9,9a-dihydro-6H-furo[2,3-H]isochromene-6,8(6aH)-dione; ΔMass: -328.1920 Da]                                                                     | 80.4 | Full match | 420.161 | 18.829 |
| Unknown | [Similar to: Cortisol; ΔMass: -57.9515 Da]                                                                                                                                                                                                  | 71.9 | Full match | 303.154 | 1.748  |
| Unknown | [Similar to: Morphine 6-β-D-glucuronide; ΔMass: 158.0143 Da]                                                                                                                                                                                | 91.1 | Full match | 405.236 | 23.724 |
| Unknown | [Similar to: 16,16-Dimethyl prostaglandin A1; ΔMass: -40.9750 Da]                                                                                                                                                                           | 82.4 | Full match | 325.2   | 30.968 |
| Unknown | [Similar to: Enalapril; ΔMass: 50.9997 Da]                                                                                                                                                                                                  | 60.2 | Full match | 524.114 | 1.85   |
| Unknown | [Similar to: Cortisol; ΔMass: -161.9051 Da]                                                                                                                                                                                                 | 92.2 | Full match | 322.139 | 35.954 |
| Unknown | [Similar to: Sinapine; ΔMass: -12.9816 Da]                                                                                                                                                                                                  | 88.6 | Full match | 473.166 | 12.219 |
| Unknown | [Similar to: Neosolaniol; ΔMass: -91.0032 Da]                                                                                                                                                                                               | 80.7 | Full match | 366.181 | 35.504 |
| Unknown | [Similar to: (4R,9β,23E)-2-(β-D-Glucopyranosyloxy)-16,20-dihydroxy-9,10,14-trimethyl-1,11,22-trioxo-4,9-cyclo-9,10-secocholesta-2,5,23-trien-25-yl acetate; ΔMass: 352.1755 Da]                                                             | 87.2 | Full match | 1012.31 | 2.55   |
| Unknown | [Similar to: Maltopentaose; ΔMass: -184.0356 Da]                                                                                                                                                                                            | 86.4 | Full match | 343.127 | 2.505  |
| Unknown | [Similar to: 2,4,6-Trideoxy-6-[(4E)-3-hydroxy-2,4-dimethyl-4-heptenylamino]-2,4-dimethylhex-5-ulosonic acid; ΔMass: 0.0728 Da]                                                                                                              | 86.2 | Full match | 357.19  | 15.143 |
| Unknown | [Similar to: (2E)-2-(((3aR,4R,6E,9S,10Z,11aS)-9-Acetoxy-6,10-dimethyl-3-methylene-2-oxo-2,3,3a,4,5,8,9,11a-octahydrocycloca[ <i>b</i> ]furan-4-yl)oxy)Carbohydrateonyl)-2-buten-1-yl (2E)-2-(hydroxymethyl)-2-butenate; ΔMass: 145.0302 Da] | 62   | Full match | 720.482 | 49.516 |
| Unknown | [Similar to: Palmitoyl sphingomyelin; ΔMass: -17.9143 Da]                                                                                                                                                                                   | 72.1 | Full match | 324.169 | 19.51  |
| Unknown | [Similar to: Quinine; ΔMass: 0.0153 Da]                                                                                                                                                                                                     | 86.4 | Full match | 366.143 | 10.205 |
| Unknown | [Similar to: 3-Methyl-5-(5,5,8a-trimethyl-2-methylene-7-oxodecahydro-1-naphthalenyl)pentyl acetate; ΔMass: -17.8763 Da]                                                                                                                     | 62.3 | Full match | 495.331 | 40.441 |
| Unknown | [Similar to: Methyl 5,6-diacetoxy-10-hydroxy-2,4h,7,7,10a,12a-hexamethyl-12-methylene-1,4,8-trioxohexadecahydro-2H-naphtho[1,2-H]isochromene-2-Carbohydrateoxylate; ΔMass: 80.9261 Da]                                                      | 60.1 | Full match | 468.358 | 56.859 |
| Unknown | [Similar to: 2-Hydroxy-22-(2-hydroxy-2-propanyl)-3,8,8,17,19-pentamethyl-23,24-dioxahaptacyclo[19.2.1.01,18.03,17.04.1407.12.012,14]tetracos-4-en-9-yl β-D-xylopyranoside; ΔMass: 150.0188 Da]                                              | 68.4 | Full match | 595.169 | 2.452  |
| Unknown | [Similar to: Chromomycin A3; ΔMass: 587.3405 Da]                                                                                                                                                                                            | 74.3 | Full match | 608.264 | 49.527 |
| Unknown | [Similar to: Azithromycin; ΔMass: 140.2449 Da]                                                                                                                                                                                              | 85.3 | Full match | 564.148 | 23.839 |
| Unknown | [Similar to: 1,5-Anhydro-1-[5,7-dihydroxy-2-(4-hydroxyphenyl)-4-oxo-4H-chromen-6-yl]hexitol; ΔMass: -132.0424 Da]                                                                                                                           | 61.2 | Full match | 380.072 | 1.612  |
| Unknown | [Similar to: Methyl (2E)-3-[5-acetoxy-9-(3-furyl)-4-hydroxy-3,3,5a,9a-tetramethyl-7-oxododecahydro[2]benzofuro[5,4-f]oxireno[d]isochromen-11b(1H)-yl]acrylate; ΔMass: 164.1587 Da]                                                          | 95.8 | Full match | 273.098 | 1.656  |
| Unknown | [Similar to: Eicosapentaenoic acid methyl ester; ΔMass: 43.1424 Da]                                                                                                                                                                         | 95.7 | Full match | 327.132 | 5.424  |
| Unknown | [Similar to: 9-Nitrooleate; ΔMass: 0.1091 Da]                                                                                                                                                                                               | 86.4 | Full match | 542.125 | 1.779  |
| Unknown | [Similar to: 1-[2-(Benzoyloxy)phenyl]-2-(1H-imidazol-1-yl)-3-phenylprop-2-en-1-one; ΔMass: -161.9725 Da]                                                                                                                                    | 95.2 | Full match | 506.106 | 26.47  |
| Unknown | [Similar to: 2-Hydroxy-3-(5-hydroxy-7,8-dimethoxy-4-oxo-4H-chromen-2-yl)phenyl β-D-glucopyranoside; ΔMass: -13.9793 Da]                                                                                                                     | 82.3 | Full match | 382.09  | 20.052 |
| Unknown | [Similar to: (S)-10-Hydroxycamptothecin; ΔMass: -17.9841 Da]                                                                                                                                                                                | 60.9 | Full match | 662.447 | 56.587 |
| Unknown | [Similar to: 1,2-Dipalmitoylphosphatidylglycerol; ΔMass: 60.0632 Da]                                                                                                                                                                        | 89.2 | Full match | 608.264 | 51.129 |
| Unknown | [Similar to: (3β,5α,9α,16α,21β,22α)-28-Acetoxy-16,22,24-trihydroxy-21-[(2E)-2-methyl-2-butenyloxy]olean-12-en-3-yl β-D-glucopyranosyl-(1->2)-[β-D-glucopyranosyl-(1->4)]-β-D-glucopyranosiduronic acid; ΔMass: 522.2872 Da]                 | 91   | Full match | 592.269 | 52.427 |
| Unknown | [Similar to: Linoleic acid-biotin; ΔMass: -71.9238 Da]                                                                                                                                                                                      | 89.5 | Full match | 592.269 | 52.15  |
| Unknown | [Similar to: Linoleic acid-biotin; ΔMass: -71.9238 Da]                                                                                                                                                                                      | 90.5 | Full match | 452.336 | 22.341 |
| Unknown | [Similar to: Philanthotoxin 74; ΔMass: -18.0106 Da]                                                                                                                                                                                         | 90.4 | Full match | 339.252 | 17.695 |
| Unknown | [Similar to: α-Linolenoyl ethanolamide; ΔMass: -17.9854 Da]                                                                                                                                                                                 | 78.8 | Full match | 704.178 | 1.957  |
| Unknown | [Similar to: 12-Benzyl-3-isobutyl-6,9-diisopropyl-5,8-dimethyldodecahydro-1H,3H-pyrrolo[1,2-q][1,4,7,10,13,17]oxapentaazacyclononadecine-1,4,7,10,13,17(14H)-hexone; ΔMass: -48.7835 Da]                                                    | 79.6 | Full match | 330.074 | 33.298 |
| Unknown | [Similar to: CAY10429; ΔMass: -15.8494 Da]                                                                                                                                                                                                  | 77.4 | Full match | 304.24  | 50.519 |
| Unknown | [Similar to: Arachidonic acid ethyl ester; ΔMass: 28.0313 Da]                                                                                                                                                                               | 78.4 | Full match | 530.401 | 58.656 |
| Unknown | [Similar to: Cortisol; ΔMass: -168.1914 Da]                                                                                                                                                                                                 | 80.7 | Full match | 366.181 | 35.937 |
| Unknown | [Similar to: (4R,9β,23E)-2-(β-D-Glucopyranosyloxy)-16,20-dihydroxy-9,10,14-trimethyl-1,11,22-trioxo-4,9-cyclo-9,10-secocholesta-2,5,23-trien-25-yl acetate; ΔMass: 352.1755 Da]                                                             | 95.6 | Full match | 225.1   | 16.746 |
| Unknown | [Similar to: Cytosine; ΔMass: -114.0569 Da]                                                                                                                                                                                                 | 91.8 | Full match | 542.104 | 20.024 |
| Unknown | [Similar to: Bergapten; ΔMass: -326.0615 Da]                                                                                                                                                                                                | 73.3 | Full match | 330.156 | 30.966 |
| Unknown | [Similar to: Hexadecanamide; ΔMass: -74.8993 Da]                                                                                                                                                                                            | 92.8 | Full match | 405.236 | 22.393 |
| Unknown | [Similar to: Hydrolyzed fumonisins B1; ΔMass: 0.1091 Da]                                                                                                                                                                                    | 73.9 | Full match | 537.148 | 20.051 |
| Unknown | [Similar to: Milbemycin A4 oxime; ΔMass: 18.1712 Da]                                                                                                                                                                                        | 78.7 | Full match | 366.202 | 30.283 |
| Unknown | [Similar to: 3-Methyl-5-(5,5,8a-trimethyl-2-methylene-7-oxodecahydro-1-naphthalenyl)pentyl acetate; ΔMass: -17.9354 Da]                                                                                                                     | 68.4 | Full match | 454.109 | 1.581  |
| Unknown | [Similar to: Obacunone; ΔMass: 0.0902 Da]                                                                                                                                                                                                   | 69.8 | Full match | 410.098 | 26.415 |
| Unknown | [Similar to: Limonin; ΔMass: 60.0962 Da]                                                                                                                                                                                                    | 69.8 | Full match | 440.216 | 18.807 |
| Unknown | [Similar to: (1α,2α,3β,5α,9α,18ε)-1,2,3,19-Tetrahydroxurs-12-en-28-oic acid; ΔMass: 64.1291 Da]                                                                                                                                             | 80.5 | Full match | 257.124 | 1.656  |
| Unknown | [Similar to: Dodecyl gallate; ΔMass: 81.0854 Da]                                                                                                                                                                                            | 70.2 | Full match | 354.179 | 18.092 |
| Unknown | [Similar to: Enriatin B1; ΔMass: 299.2460 Da]                                                                                                                                                                                               | 72.4 | Full match | 264.147 | 12.925 |
| Unknown | [Similar to: L-Phenylalanine; ΔMass: -99.0684 Da]                                                                                                                                                                                           | 62.3 | Full match | 336.165 | 1.689  |
| Unknown | [Similar to: (+/-)-12-HpETE; ΔMass: 0.0655 Da]                                                                                                                                                                                              | 64.9 | Full match | 292.056 | 1.594  |
| Unknown | [Similar to: 3,5-Dihydroxy-4-[3-(4-hydroxyphenyl)propanoyl]phenyl 6-O-(3,4,5-trihydroxybenzoyl)-β-D-glucopyranoside; ΔMass: 296.0919 Da]                                                                                                    | 88.7 | Full match | 389.241 | 22.327 |
| Unknown | [Similar to: JWH 019 N-(6-hydroxyhexyl) metabolite; ΔMass: -18.0528 Da]                                                                                                                                                                     |      |            |         |        |

|         |                                                                                                                                                                                                                                                   |      |            |         |        |
|---------|---------------------------------------------------------------------------------------------------------------------------------------------------------------------------------------------------------------------------------------------------|------|------------|---------|--------|
| Unknown | [Similar to: Hesperetin; ΔMass: -212.0687 Da]                                                                                                                                                                                                     | 62.3 | Full match | 514.148 | 30.75  |
| Unknown | [Similar to: N,N'-Bis(2,2,6,6-tetramethyl-4-piperidyl)-N,N'-diformylhexamethylenediamine; ΔMass: 121.1983 Da]                                                                                                                                     | 61.6 | Full match | 329.195 | 11.861 |
| Unknown | [Similar to: Limonin; ΔMass: -25.9772 Da]                                                                                                                                                                                                         | 65.5 | Full match | 496.171 | 28.662 |
| Unknown | [Similar to: (1S,4aR,5S)-5-[(3E)-5-Methoxy-3-methyl-5-oxo-3-penten-1-yl]-1,4a-dimethyl-6-methylenedecahydro-1-naphthaleneCarbohydrateoxylic acid; ΔMass: 42.0469 Da]                                                                              | 87   | Full match | 306.183 | 37.9   |
| Unknown | [Similar to: 15-Deoxy-Δ12,14-prostaglandin J2-2-glycerol ester; ΔMass: -17.9338 Da]                                                                                                                                                               | 81.3 | Full match | 408.174 | 2.923  |
| Unknown | [Similar to: Palmitoyl sphingomyelin; ΔMass: -68.9752 Da]                                                                                                                                                                                         | 60.1 | Full match | 771.543 | 53.834 |
| Unknown | [Similar to: Thromboxane B2-biotin; ΔMass: 116.1809 Da]                                                                                                                                                                                           | 68.4 | Full match | 564.237 | 53.715 |
| Unknown | [Similar to: Dihomo-γ-linolenic acid methyl ester; ΔMass: -17.8417 Da]                                                                                                                                                                            | 70.4 | Full match | 338.113 | 36.01  |
| Unknown | [Similar to: 2-Hydroxy-4,4,6,6-tetramethyl-2-(2-methyl-1-propen-1-yl)-3,5-dioxocyclohexyl 6-O-(3,4,5-trihydroxybenzoyl)-β-D-glucopyranoside; ΔMass: 236.1534 Da]                                                                                  | 81.6 | Full match | 332.062 | 1.282  |
| Unknown | [Similar to: Diphenyleneiodonium; ΔMass: -48.1885 Da]                                                                                                                                                                                             | 73   | Full match | 326.148 | 19.585 |
| Unknown | [Similar to: 3-O-β-D-Glucopyranosylandrographolide; ΔMass: -81.9862 Da]                                                                                                                                                                           | 84.2 | Full match | 594.248 | 50.157 |
| Unknown | [Similar to: AL 8810; ΔMass: 38.0344 Da]                                                                                                                                                                                                          | 67.7 | Full match | 364.186 | 32.104 |
| Unknown | [Similar to: Nervonic acid; ΔMass: 0.1689 Da]                                                                                                                                                                                                     | 75.2 | Full match | 366.181 | 36.311 |
| Unknown | [Similar to: Cinchonine; ΔMass: -0.0463 Da]                                                                                                                                                                                                       | 89.8 | Full match | 294.22  | 45.4   |
| Unknown | [Similar to: Tetrahydrocortisone; ΔMass: 0.0597 Da]                                                                                                                                                                                               | 62.2 | Full match | 364.165 | 37.357 |
| Unknown | [Similar to: Diphenyleneiodonium; ΔMass: -34.1729 Da]                                                                                                                                                                                             | 70.7 | Full match | 312.132 | 15.013 |
| Unknown | [Similar to: Diphenyleneiodonium; ΔMass: -82.1729 Da]                                                                                                                                                                                             | 60.2 | Full match | 360.132 | 18.953 |
| Unknown | [Similar to: Sucrose acetate isobutyrate; ΔMass: 534.2564 Da]                                                                                                                                                                                     | 70.5 | Full match | 312.132 | 18.215 |
| Unknown | [Similar to: Prostaglandin E2-1-glycerol ester; ΔMass: 0.0615 Da]                                                                                                                                                                                 | 78.6 | Full match | 426.2   | 14.471 |
| Unknown | [Similar to: 2-{3-[(4E)-6-Acetoxy-2-hydroxy-6-methyl-3-oxo-4-hepten-2-yl]-6-(Carbohydrateoxymethyl)-2-hydroxy-3a,5a,9b-trimethyl-5-oxo-2,3,3a,4,5,5a,6,9a,9b-decahydro-1H-cyclopenta[a]naphthalen-7-yl}-2-methylpropanoic acid; ΔMass: 0.0559 Da] | 78.3 | Full match | 590.253 | 51.839 |
| Unknown | [Similar to: AL 8810; ΔMass: -19.9695 Da]                                                                                                                                                                                                         | 80   | Full match | 422.19  | 4.093  |
| Unknown | [Similar to: 2-{4-[3-(5-Fluoro-1H-indol-3-yl)propyl]piperazino}-N-phenylacetamide fumarate; ΔMass: -114.0230 Da]                                                                                                                                  | 60.8 | Full match | 508.24  | 1.665  |
| Unknown | [Similar to: Linoleic acid-biotin; ΔMass: -27.8978 Da]                                                                                                                                                                                            | 77.1 | Full match | 548.242 | 51.513 |
| Unknown | [Similar to: Metolachlor; ΔMass: -99.9739 Da]                                                                                                                                                                                                     | 93.9 | Full match | 383.108 | 11.71  |
| Unknown | [Similar to: Propachlor OXA; ΔMass: -71.0735 Da]                                                                                                                                                                                                  | 62.1 | Full match | 378.163 | 18.937 |
| Unknown | [Similar to: AL 8810; ΔMass: 38.0344 Da]                                                                                                                                                                                                          | 67.7 | Full match | 364.186 | 32.909 |
| Unknown | [Similar to: {3-(E)-2-(1,3-Benzodioxol-5-yl)vinyl}-2-oxiranyl(1-piperidinyl)methanone; ΔMass: -67.9898 Da]                                                                                                                                        | 85   | Full match | 369.121 | 15.388 |
| Unknown | [Similar to: 9S,13R-12-Oxophytodienoic acid; ΔMass: -18.0106 Da]                                                                                                                                                                                  | 83.6 | Full match | 310.214 | 40.551 |
| Unknown | [Similar to: Methyl (2E)-3-[5-acetoxy-9-(3-furyl)-4-hydroxy-3,3,5a,9a-tetramethyl-7-oxododecahydro[2]benzofuro[5,4-f]oxireno[d]isochromen-11b(1H)-yl]acrylate; ΔMass: 150.2570 Da]                                                                | 65   | Full match | 393.974 | 1.098  |
| Unknown | [Similar to: (2E)-2-([[(3aR,4R,6E,9S,10Z,11aS)-9-Acetoxy-6,10-dimethyl-3-methylene-2-oxo-2,3,3a,4,5,8,9,11a-octahydrocyclodecab]furan-4-yl)oxy]Carbohydrateoxy)-2-buten-1-yl (2E)-2-(hydroxymethyl)-2-butenate; ΔMass: 175.0045 Da]               | 76.3 | Full match | 327.216 | 16.354 |
| Unknown | [Similar to: Sorbitan monolaurate; ΔMass: -17.9491 Da]                                                                                                                                                                                            | 83.4 | Full match | 364.185 | 4.045  |
| Unknown | [Similar to: 4-[(1S,3aR,4S,6aR)-4-(3,4-Dimethoxyphenyl)tetrahydro-1H,3H-furo[3,4-c]furan-1-yl]-2-methoxyphenol; ΔMass: 18.0622 Da]                                                                                                                | 65   | Full match | 354.095 | 14.728 |
| Unknown | [Similar to: Diosgenin; ΔMass: -107.0366 Da]                                                                                                                                                                                                      | 71.2 | Full match | 521.35  | 47.845 |
| Unknown | [Similar to: Tomatidine; ΔMass: -41.0479 Da]                                                                                                                                                                                                      | 74.3 | Full match | 456.393 | 46.371 |
| Unknown | [Similar to: Sakuranin; ΔMass: -231.9815 Da]                                                                                                                                                                                                      | 90.7 | Full match | 680.119 | 10.353 |
| Unknown | [Similar to: (1S,2S,8E,9β,16a,17E)-1-(β-D-Glucopyranosyloxy)-2,16,20-trihydroxy-9,10,14-trimethyl-11,22-dioxo-4,9-cyclo-9,10-secocholest-5-en-25-yl acetate; ΔMass: -123.8174 Da]                                                                 | 83.6 | Full match | 848.221 | 2.437  |
| Unknown | [Similar to: 3-(5-Hydroxy-2,2,7,8-tetramethyl-6-oxo-7,8-dihydro-2H,6H-pyran[3,2-g]chromen-10-yl)hexanoic acid; ΔMass: -137.9205 Da]                                                                                                               | 74.4 | Full match | 526.109 | 25.595 |
| Unknown | [Similar to: Octadecanamine; ΔMass: -256.2040 Da]                                                                                                                                                                                                 | 66.5 | Full match | 525.512 | 51.918 |
| Unknown | [Similar to: Schaftoside; ΔMass: -117.0151 Da]                                                                                                                                                                                                    | 72.8 | Full match | 681.163 | 30.535 |
| Unknown | [Similar to: 12-Benzyl-3-isobutyl-6,9-diisopropyl-5,8-dimethyldodecahydro-1H,3H-pyrrolo[1,2-q][1,4,7,10,13,17]oxapentaazacyclononadecine-1,4,7,10,13,17(14H)-hexone; ΔMass: 96.9656 Da]                                                           | 64.2 | Full match | 558.429 | 50.603 |
| Unknown | [Similar to: Haplamine; ΔMass: -235.1608 Da]                                                                                                                                                                                                      | 66.4 | Full match | 492.266 | 1.673  |
| Unknown | [Similar to: 2-Amino-1,3,4-octadecanetriol; ΔMass: -550.3630 Da]                                                                                                                                                                                  | 67.7 | Full match | 867.656 | 43.13  |
| Unknown | [Similar to: (2S,2S,3R,3'R)-7-(β-D-Glucopyranosyloxy)-5,5'-dihydroxy-2,2'-bis(4-hydroxyphenyl)-4,4'-dioxo-3,3',4,4'-tetrahydro-2H,2H',3,3'-bichromen-7-yl β-D-glucopyranoside; ΔMass: 64.0805 Da]                                                 | 93   | Full match | 802.146 | 1.938  |
| Unknown | [Similar to: 9(Z),11(E),13(E)-Octadecatrienoic Acid methyl ester; ΔMass: -23.9612 Da]                                                                                                                                                             | 98.6 | Full match | 316.201 | 44.17  |
| Unknown | [Similar to: C-8 Ceramide-1-phosphate; ΔMass: -40.0034 Da]                                                                                                                                                                                        | 70.3 | Full match | 545.357 | 31.595 |
| Unknown | [Similar to: C-8 Ceramide-1-phosphate; ΔMass: -40.0033 Da]                                                                                                                                                                                        | 68.2 | Full match | 545.357 | 32.396 |
| Unknown | [Similar to: (4R,9β,23E)-2-(β-D-Glucopyranosyloxy)-16,20-dihydroxy-9,10,14-trimethyl-1,11,22-trioxo-4,9-cyclo-9,10-secocholesta-2,5,23-trien-25-yl acetate; ΔMass: -240.2105 Da]                                                                  | 89.5 | Full match | 958.567 | 55.899 |
| Unknown | [Similar to: (2S,2S,3R,3'R)-7-(β-D-Glucopyranosyloxy)-5,5'-dihydroxy-2,2'-bis(4-hydroxyphenyl)-4,4'-dioxo-3,3',4,4'-tetrahydro-2H,2H',3,3'-bichromen-7-yl β-D-glucopyranoside; ΔMass: -196.0001 Da]                                               | 66.9 | Full match | 1062.23 | 20.052 |
| Unknown | [Similar to: Diosgenin; ΔMass: -107.1159 Da]                                                                                                                                                                                                      | 71.2 | Full match | 521.429 | 47.888 |
| Unknown | [Similar to: Natamycin; ΔMass: 34.0268 Da]                                                                                                                                                                                                        | 78.5 | Full match | 631.278 | 33.671 |
| Unknown | [Similar to: Octadecyl 3-(3,5-di-tert-butyl-4-hydroxyphenyl)propionate; ΔMass: -34.9506 Da]                                                                                                                                                       | 81.7 | Full match | 565.421 | 25.774 |
| Unknown | [Similar to: Chromomycin A3; ΔMass: 154.2255 Da]                                                                                                                                                                                                  | 87.9 | Full match | 1028.28 | 2.542  |
| Unknown | [Similar to: C-8 Ceramide-1-phosphate; ΔMass: -40.0033 Da]                                                                                                                                                                                        | 69.9 | Full match | 545.357 | 31.986 |
| Unknown | [Similar to: Azithromycin; ΔMass: -85.0537 Da]                                                                                                                                                                                                    | 66.4 | Full match | 833.562 | 48.213 |
| Unknown | [Similar to: Psychosine; ΔMass: 0.0727 Da]                                                                                                                                                                                                        | 84.7 | Full match | 461.263 | 23.777 |
| Unknown | [Similar to: Tacrolimus; ΔMass: 170.1078 Da]                                                                                                                                                                                                      | 63.5 | Full match | 633.374 | 30.971 |
| Unknown | [Similar to: Azithromycin; ΔMass: 140.1029 Da]                                                                                                                                                                                                    | 65.4 | Full match | 608.406 | 44.038 |
| Unknown | [Similar to: Arctiin; ΔMass: 4.3033 Da]                                                                                                                                                                                                           | 89.4 | Full match | 529.907 | 1.066  |

\*known fungal metabolite

**Table S4** Secondary metabolites identified by LC FTICR-MS/MS (negative ion mode) and validated by predicted composition and/or ChemSpider, where unknown compounds were generated a similarity compound based on mzCloud simulation.

| Class                                            | Name                                                                                                                                                                 | Formula         | mzCloud Search | mzCloud Sim. | Predicted Compositions | ChemSpider      | m/z       | Molecular Weight | RT [min] |
|--------------------------------------------------|----------------------------------------------------------------------------------------------------------------------------------------------------------------------|-----------------|----------------|--------------|------------------------|-----------------|-----------|------------------|----------|
| DiCarbohydrateoxylate                            | 4-tert-Butyl 3-ethyl thiomorpholine-3,4-diCarbohydrateoxylate                                                                                                        | C12 H21 N O4 S  |                |              | Full match             | Full match      | 274.11191 | 275.11918        | 34.495   |
| Ester                                            | Metilox                                                                                                                                                              | C18 H28 O3      |                |              | Full match             | Full match      | 291.19662 | 292.2039         | 44.07    |
| Acid                                             | ricinelaidic acid                                                                                                                                                    | C18 H34 O3      |                |              | Full match             | Full match      | 297.24358 | 298.25085        | 46.716   |
| Other                                            | 14,14-Bis(ethylsulfanyl)dispiro[5.1.5.1]tetradecan-7-one                                                                                                             | C18 H30 O S2    |                |              | Full match             | Full match      | 325.16573 | 326.17301        | 36.983   |
| Alcohol                                          | 1,3-Bis([3-(aminomethyl)benzyl]amino)-2-propanol                                                                                                                     | C19 H28 N4 O    | 65.6           |              | Full match             | Full match      | 327.21777 | 328.22505        | 37.274   |
| fatty acid-taurine conjugate                     | N-tetradecanoyltaurine                                                                                                                                               | C16 H33 N O4 S  |                |              | Full match             | Full match      | 334.20583 | 335.21311        | 43.76    |
| Glycerol                                         | Glycerol trivalerate                                                                                                                                                 | C18 H32 O6      |                |              | Full match             | Full match      | 343.21266 | 344.21994        | 30.183   |
| Acid                                             | DL-alpha-Hydroxybehenic acid                                                                                                                                         | C22 H44 O3      |                |              | Full match             | Full match      | 355.32184 | 356.32912        | 51.636   |
| quinoline                                        | etisulergine                                                                                                                                                         | C19 H28 N4 O2 S |                |              | Full match             | Full match      | 375.18484 | 376.19212        | 39.201   |
| antibacterial                                    | Actinonin                                                                                                                                                            | C19 H35 N3 O5   |                |              | Full match             | Full match      | 384.2505  | 385.25778        | 17.76    |
| Phenol                                           | 2-[Bis(4-phenyl-1,3-thiazol-2-yl)amino]methyl]phenol                                                                                                                 | C25 H20 N4 O S2 |                |              | Full match             | Full match      | 455.09871 | 456.10599        | 18.01    |
| nucleoside                                       | 5'-O-[Hydroxy(2-propylpentanoyloxy)phosphoryl]adenosine                                                                                                              | C18 H28 N5 O8 P |                |              | Full match             | Full match      | 472.15886 | 473.16614        | 12.282   |
| Acid                                             | Didecyl sebacate                                                                                                                                                     | C30 H58 O4      |                |              | Full match             | Full match      | 481.42643 | 482.43371        | 59.779   |
| Fatty acid, derivative of cytarabine             | Elacytarabine                                                                                                                                                        | C27 H45 N3 O6   | 97.9           |              | Full match             | Full match      | 506.3256  | 507.33288        | 51.127   |
| Craboxylate                                      | 2-(6-Amino-1,3-dimethyl-2,4-dioxo-1,2,3,4-tetrahydro-5-pyrimidinyl)-2-oxoethyl 4-(2-thienylmethylene)-1,2,3,4-tetrahydro-9-acridineCarbohydrateoxylate               | C27 H24 N4 O5 S |                |              | Full match             | Full match      | 515.14112 | 516.1484         | 14.348   |
| Flavone                                          | 5,7-Dihydroxy-2-nonacosyl-4H-chromen-4-one                                                                                                                           | C38 H64 O4      |                |              | Full match             | Full match      | 583.47366 | 584.48096        | 50.611   |
| Pyridazine                                       | 2-[(4-Butyl-1-piperazinyl)methyl]-6-phenyl-3(2H)-pyridazinone                                                                                                        | C19 H26 N4 O    |                |              | Full match             | Full match      | 325.20212 | 326.2094         | 35.655   |
| Alcohol                                          | 1-[2-[2-(2-Phenoxypropoxy)propoxy]propoxy]-1-propanol                                                                                                                | C18 H30 O5      |                |              | Full match             | Not the top hit | 325.20212 | 326.20955        | 36.252   |
| Acid                                             | Diethyl diallylmalonate                                                                                                                                              | C13 H20 O4      | 97.8           |              | Full match             | Full match      | 239.12894 | 240.13621        | 37.355   |
| diCarbohydrateoxylate anhydride                  | (2-Dodecen-1-yl)succinic anhydride                                                                                                                                   | C16 H26 O3      | 77.6           |              | Full match             | Full match      | 265.18096 | 266.18824        | 41.255   |
| Acid                                             | (E)-parinaric acid                                                                                                                                                   | C18 H28 O2      | 93.3           |              | Full match             | Full match      | 275.2017  | 276.20898        | 48.378   |
| Alcohol                                          | OCTOXYNOL-2                                                                                                                                                          | C18 H30 O3      | 72.4           |              | Full match             | Full match      | 293.21226 | 294.21954        | 44.064   |
| Acid                                             | 4-Decylbenzenesulfonic acid                                                                                                                                          | C16 H26 O3 S    | 75             |              | Full match             | Full match      | 297.15306 | 298.16033        | 46.214   |
| Amine                                            | 5-Heptylbenzo[1]quinazoline-1,3-diamine                                                                                                                              | C19 H24 N4      | 70.7           |              | Full match             | Not the top hit | 307.19155 | 308.19897        | 38.122   |
| Amine                                            | N-[1-(4-Benzyl-1-piperazinyl)-2-propanyl]-2-pyridinamine                                                                                                             | C19 H26 N4      | 77.6           |              | Full match             | Full match      | 309.20717 | 310.21445        | 41.261   |
| Acid                                             | Undecylbenzenesulfonic acid                                                                                                                                          | C17 H28 O3 S    | 80.2           |              | Full match             | Full match      | 311.16869 | 312.17597        | 47.826   |
| serotonin 5-HT3 receptor                         | Granisetron                                                                                                                                                          | C18 H24 N4 O    | 70.6           |              | Full match             | Full match      | 311.18646 | 312.1938         | 38.866   |
| Amine                                            | 1-Cyclohexyl-5-(1-piperidinylmethyl)-1H-benzimidazol-2-amine                                                                                                         | C19 H28 N4      | 62.3           |              | Full match             | Not the top hit | 311.22283 | 312.2301         | 39.523   |
| Alcohol                                          | 1-[2-[2-(2-Phenoxypropoxy)propoxy]propoxy]-1-propanol                                                                                                                | C18 H30 O5      | 94.6           |              | Full match             | Full match      | 325.20212 | 326.2094         | 37.402   |
| Diol                                             | (1S,2S)-1,2-Di[(2R)-1,4-dioxaspiro[4.5]dec-2-yl]-1,2-ethanediol                                                                                                      | C18 H30 O6      | 73.3           |              | Full match             | Full match      | 341.19704 | 342.20432        | 32.898   |
| cannabinoid                                      | ADB-PINACA                                                                                                                                                           | C19 H28 N4 O2   | 72.9           |              | Full match             | Full match      | 343.21266 | 344.21994        | 32.003   |
| dialkyl sulfosuccinates, are anionic surfactants | DIHEXYL SULFOSUCCINATE                                                                                                                                               | C16 H30 O7 S    | 82             |              | Full match             | Full match      | 365.16404 | 366.17131        | 40.723   |
| cannabinoid                                      | ADB-CHMINACA                                                                                                                                                         | C21 H30 N4 O2   | 63.7           |              | Full match             | Full match      | 369.22839 | 370.23567        | 36.524   |
| Amide                                            | N-[3-(N'-Carbohydrateamidoyl)Carbohydrateamidamido]propyl]-N,N"-diphenylimidodiCarbohydrateonimidic diamide                                                          | C19 H26 N10     | 83.7           |              | Full match             | Full match      | 393.22845 | 394.23572        | 34.509   |
| Amide                                            | [(CyclohexylCarbohydrateamoyl)(nitroso)amino]ethyl]-5-(2,4-dioxo-3,4-dihydro-1(2H)-pyrimidinyl)-3,4-dihydroxytetrahydro-2-furanCarbohydrateoxamide                   | C18 H26 N6 O8   | 85.3           |              | Full match             | Full match      | 453.17416 | 454.18143        | 11.063   |
| Diol                                             | Lexacalcitol                                                                                                                                                         | C29 H48 O4      | 84.2           |              | Full match             | Full match      | 459.34822 | 460.3555         | 51.664   |
| Alcohol/phenol                                   | 4-tert-Octylphenol monoethoxylate                                                                                                                                    | C16 H26 O2      | 93.2           |              | Full match             | Full match      | 499.3795  | 250.19336        | 47.23    |
| Sugar                                            | (1R,3S)-3-Glycolyl-3,5,12-trihydroxy-10-methoxy-6,11-dioxo-1,2,3,4,6,11-hexahydro-1-tetraceny beta-D-ribofuranoside                                                  | C26 H26 O13     | 88.7           |              | Full match             | Full match      | 545.13061 | 546.13788        | 23.064   |
| Alcohol                                          | OCTOXYNOL-2                                                                                                                                                          | C18 H30 O3      | 75.8           |              | Full match             | Full match      | 587.43214 | 294.21963        | 44.273   |
| chlorophyll breakdown                            | pheophorbide b                                                                                                                                                       | C35 H34 N4 O6   | 83.4           |              | Full match             | Full match      | 605.24134 | 606.24862        | 50.123   |
| Amine                                            | N-(4-Isopropylphenyl)-5-[(4-methyl-1-piperazinyl)sulfonyl]-2-pyridinamine                                                                                            | C19 H26 N4 O2 S | 62.7           |              | Full match             | Full match      | 373.16916 | 374.17643        | 37.773   |
| Unknown                                          | [Similar to: 16-Hydroxyhexadecanoic acid; ΔMass: 28.1040 Da]                                                                                                         |                 | Predicted      | 91.9         | Full match             |                 | 243.12384 | 244.13111        | 27.9     |
| Unknown                                          | [Similar to: Curcumin; ΔMass: 106.0782 Da]                                                                                                                           |                 | Predicted      | 98.3         | Full match             |                 | 261.04053 | 262.0478         | 29.158   |
| Unknown                                          | [Similar to: 4-[(β-D-Glucopyranosyloxy)methyl]-6,7-dihydroxy-7-(hydroxymethyl)-1,4a,5,6,7,7a-hexahydrocyclopenta[c]pyran-1-yl 3-methylbutanoate; ΔMass: 238.1416 Da] |                 | Predicted      | 84.1         | Full match             |                 | 239.05616 | 240.06344        | 16.282   |
| Unknown                                          | [Similar to: 11-Deoxy prostaglandin F2β; ΔMass: 70.1662 Da]                                                                                                          |                 | Predicted      | 60.9         | Full match             |                 | 267.07219 | 268.07947        | 1.259    |
| Unknown                                          | [Similar to: β-D-Fructose 6-phosphate ; ΔMass: -18.0106 Da]                                                                                                          |                 | Predicted      | 87.5         | Full match             |                 | 277.03304 | 278.04032        | 1.192    |
| Unknown                                          | [Similar to: 11(Z),14(Z),17(Z)-Eicosatrienoic acid; ΔMass: 0.0727 Da]                                                                                                |                 | Predicted      | 68.4         | Full match             |                 | 305.17591 | 306.18319        | 37.938   |
| Unknown                                          | [Similar to: N-Feruloyloctopamine; ΔMass: 17.0417 Da]                                                                                                                |                 | Predicted      | 77           | Full match             |                 | 311.07731 | 312.08458        | 10.653   |

|         |                                                                                                                                                                                                                          |           |      |            |           |           |        |
|---------|--------------------------------------------------------------------------------------------------------------------------------------------------------------------------------------------------------------------------|-----------|------|------------|-----------|-----------|--------|
| Unknown | [Similar to: Geniposide; ΔMass: 70.0749 Da]                                                                                                                                                                              | Predicted | 85.7 | Full match | 317.05481 | 318.06209 | 1.808  |
| Unknown | [Similar to: Geniposide; ΔMass: 70.0749 Da]                                                                                                                                                                              | Predicted | 85.6 | Full match | 317.05481 | 318.06209 | 1.174  |
| Unknown | [Similar to: 7-(Hydroxymethyl)-2,5a,11,11,13a-pentamethyl-3a,5a,6,8,12,13a,13b,13c-octahydrofuro[4,3,2-ij]pyrano[4',3':4,5]cyclohepta[1,2-f]isochromene-1,5,9,13(2H,11H)-tetrone; ΔMass: 117.9868 Da]                    | Predicted | 76   | Full match | 325.18439 | 326.19166 | 49.549 |
| Unknown | [Similar to: Docosahexaenoyl glycine; ΔMass: 57.0730 Da]                                                                                                                                                                 | Predicted | 78.8 | Full match | 327.18138 | 328.18865 | 34.324 |
| Unknown | [Similar to: Bumetrizole; ΔMass: -14.9602 Da]                                                                                                                                                                            | Predicted | 95.5 | Full match | 329.06674 | 330.07402 | 33.271 |
| Unknown | [Similar to: Gibberellin A4; ΔMass: 0.1091 Da]                                                                                                                                                                           | Predicted | 78   | Full match | 331.04602 | 332.05329 | 32.014 |
| Unknown | [Similar to: (+/-)-12-HpETE; ΔMass: -9.8389 Da]                                                                                                                                                                          | Predicted | 85.3 | Full match | 345.06172 | 346.069   | 34.944 |
| Unknown | [Similar to: 2-[(2S,4aR,8aS)-2-Hydroxy-4a-methyl-8-methylenedecahydro-2-naphthalenyl]acrylic acid; ΔMass: -101.9802 Da]                                                                                                  | Predicted | 69   | Full match | 351.12975 | 352.13714 | 17.199 |
| Unknown | [Similar to: Arachidic acid; ΔMass: -49.9042 Da]                                                                                                                                                                         | Predicted | 72.3 | Full match | 361.19978 | 362.20706 | 44.268 |
| Unknown | [Similar to: 16-(Hexopyranosyloxy)-7-hydroxy-8,9-epoxypimaran-18-oic acid; ΔMass: 144.0421 Da]                                                                                                                           | Predicted | 61.4 | Full match | 369.22839 | 370.23567 | 35.925 |
| Unknown | [Similar to: Prostaglandin F1α; ΔMass: -17.9202 Da]                                                                                                                                                                      | Predicted | 64.5 | Full match | 373.16916 | 374.17643 | 37.384 |
| Unknown | [Similar to: Hydroxykynurenine; ΔMass: -159.0281 Da]                                                                                                                                                                     | Predicted | 67   | Full match | 382.10057 | 383.10785 | 11.783 |
| Unknown | [Similar to: (2E)-3-(4-Acetoxy-2,3-dihydroxy-2,5,5,8a-tetramethyldecahydro-1-naphthalenyl)acrylic acid; ΔMass: -32.0264 Da]                                                                                              | Predicted | 71.1 | Full match | 385.22333 | 386.23061 | 37.328 |
| Unknown | [Similar to: Calcitriol; ΔMass: 18.0620 Da]                                                                                                                                                                              | Predicted | 68.3 | Full match | 397.25974 | 398.26701 | 43.563 |
| Unknown | [Similar to: Linoleic acid; ΔMass: -128.9699 Da]                                                                                                                                                                         | Predicted | 61.9 | Full match | 408.2029  | 409.21017 | 30.461 |
| Unknown | [Similar to: Calcitriol; ΔMass: -7.9536 Da]                                                                                                                                                                              | Predicted | 70.3 | Full match | 423.27538 | 424.28266 | 49.381 |
| Unknown | [Similar to: Anandamide (AEA); ΔMass: -77.9228 Da]                                                                                                                                                                       | Predicted | 66.9 | Full match | 424.19795 | 425.20523 | 21.707 |
| Unknown | [Similar to: ARN1203; ΔMass: -59.9719 Da]                                                                                                                                                                                | Predicted | 69.6 | Full match | 438.25326 | 439.26054 | 32.35  |
| Unknown | [Similar to: 3-Hydroxyurs-12-en-23-oic acid; ΔMass: 17.0539 Da]                                                                                                                                                          | Predicted | 91   | Full match | 438.29918 | 439.30645 | 50.059 |
| Unknown | [Similar to: 11-Deoxy prostaglandin F2β; ΔMass: -101.8476 Da]                                                                                                                                                            | Predicted | 61   | Full match | 439.08602 | 440.09329 | 1.692  |
| Unknown | [Similar to: 4a,7b-Dihydroxy-3-(hydroxymethyl)-9a-(isobutyryloxy)-1,1,6,8-tetramethyl-5-oxo-1a,1b,4,4a,5,7a,7b,8,9,9a-decahydro-1H-cyclopropa[3,4]benzo[1,2-E]azulen-9-yl (2E)-2-methyl-2-butenate; ΔMass: 74.1821 Da]   | Predicted | 69.4 | Full match | 441.08296 | 442.09023 | 24.132 |
| Unknown | [Similar to: Corchorifatty acid F; ΔMass: -116.0112 Da]                                                                                                                                                                  | Predicted | 79.3 | Full match | 443.22885 | 444.23613 | 36.013 |
| Unknown | [Similar to: Corchorifatty acid F; ΔMass: -116.0112 Da]                                                                                                                                                                  | Predicted | 81.1 | Full match | 443.22885 | 444.23613 | 37.345 |
| Unknown | [Similar to: Xanthohumol; ΔMass: -97.9254 Da]                                                                                                                                                                            | Predicted | 87.8 | Full match | 451.06488 | 452.07215 | 14.783 |
| Unknown | [Similar to: Ascorbyl palmitate; ΔMass: -39.0239 Da]                                                                                                                                                                     | Predicted | 96.5 | Full match | 452.2784  | 453.28568 | 48.818 |
| Unknown | [Similar to: Cucurbitacin I 2-O-β-D-glucopyranoside; ΔMass: 220.0873 Da]                                                                                                                                                 | Predicted | 62.9 | Full match | 455.25131 | 456.25858 | 17.873 |
| Unknown | [Similar to: 4H-1-Benzopyran-4-one, 6-β-D-glucopyranosyl-2,3-dihydro-5,7-dihydroxy-2-(4-hydroxyphenyl)-, (S)-; ΔMass: -23.9850 Da]                                                                                       | Predicted | 67.7 | Full match | 457.09899 | 458.10627 | 15.781 |
| Unknown | [Similar to: Afzelin; ΔMass: -29.9745 Da]                                                                                                                                                                                | Predicted | 78.7 | Full match | 461.07283 | 462.0801  | 23.955 |
| Unknown | [Similar to: Lamalbid; ΔMass: -43.9454 Da]                                                                                                                                                                               | Predicted | 64.7 | Full match | 465.08053 | 466.0878  | 18.141 |
| Unknown | [Similar to: Prostaglandin A1 ethyl ester; ΔMass: -110.9191 Da]                                                                                                                                                          | Predicted | 89.6 | Full match | 474.17317 | 475.18045 | 13.649 |
| Unknown | [Similar to: Methyl 2-[[2-O-(6-deoxy-α-L-mannopyranosyl)-β-D-glucopyranosyl]oxy] benzoate; ΔMass: -15.9385 Da]                                                                                                           | Predicted | 72.9 | Full match | 475.08849 | 476.09658 | 26.535 |
| Unknown | [Similar to: Oleic acid; ΔMass: -197.0455 Da]                                                                                                                                                                            | Predicted | 96.6 | Full match | 478.29414 | 479.30142 | 49.378 |
| Unknown | [Similar to: Docosahexaenoic acid; ΔMass: -153.0769 Da]                                                                                                                                                                  | Predicted | 96.6 | Full match | 480.30982 | 481.31709 | 50.836 |
| Unknown | [Similar to: Oleic acid-biotin; ΔMass: 29.0432 Da]                                                                                                                                                                       | Predicted | 93.4 | Full match | 492.30984 | 493.31712 | 50.312 |
| Unknown | [Similar to: 2-((4-(4-(2,4-dimethoxy-6-methylbenzoyloxy)-2-methyl-6-((2S,3R,4S,5S,6R)-3,4,5-trihydroxy-6-(hydroxymethyl)oxan-2-yl)oxy)benzoyloxy)-2-hydroxy-6-methylphenyl)formamido)propanoic acid; ΔMass: 235.9081 Da] | Predicted | 66   | Full match | 492.31154 | 493.31882 | 45.138 |
| Unknown | [Similar to: 2-(hydroxymethyl)-6-[(E)-4-(1,2,4-trihydroxy-2,6,6-trimethylcyclohexyl)but-3-en-2-yl]oxyoxane-3,4,5-triol; ΔMass: -89.8805 Da]                                                                              | Predicted | 70.3 | Full match | 495.09349 | 496.10077 | 12.706 |
| Unknown | [Similar to: AUDA; ΔMass: -103.9384 Da]                                                                                                                                                                                  | Predicted | 62.5 | Full match | 495.23506 | 496.24234 | 32.593 |
| Unknown | [Similar to: Abietic acid; ΔMass: -198.1470 Da]                                                                                                                                                                          | Predicted | 70   | Full match | 499.36427 | 500.37155 | 51.65  |
| Unknown | [Similar to: Arachidonic acid; ΔMass: -197.0456 Da]                                                                                                                                                                      | Predicted | 86.5 | Full match | 500.27851 | 501.28579 | 48.017 |
| Unknown | [Similar to: 4H-1-Benzopyran-4-one, 6-β-D-glucopyranosyl-2,3-dihydro-5,7-dihydroxy-2-(4-hydroxyphenyl)-, (S)-; ΔMass: -70.0059 Da]                                                                                       | Predicted | 92.6 | Full match | 503.11988 | 504.12725 | 25.647 |
| Unknown | [Similar to: 1-O-(1,3,23,24,25-Pentahydroxy-28-oxo-9,19-cycloanonan-28-yl)hexopyranose; ΔMass: 180.0631 Da]                                                                                                              | Predicted | 70.5 | Full match | 503.33813 | 504.3454  | 37.92  |
| Unknown | [Similar to: Lariciresinol 4-O-glucoside; ΔMass: 16.1038 Da]                                                                                                                                                             | Predicted | 89.9 | Full match | 505.09904 | 506.10631 | 26.531 |
| Unknown | [Similar to: Quercetin-3β-D-glucoside; ΔMass: -42.0108 Da]                                                                                                                                                               | Predicted | 61   | Full match | 505.09904 | 506.10631 | 25.376 |
| Unknown | [Similar to: 4-Allyl-2-(β-D-glucopyranosyloxy)phenyl β-D-glucopyranoside; ΔMass: -43.9692 Da]                                                                                                                            | Predicted | 66.2 | Full match | 517.13564 | 518.14292 | 22.468 |
| Unknown | [Similar to: 4H-1-Benzopyran-4-one, 6-β-D-glucopyranosyl-2,3-dihydro-5,7-dihydroxy-2-(4-hydroxyphenyl)-, (S)-; ΔMass: -85.9894 Da]                                                                                       | Predicted | 97   | Full match | 519.10344 | 520.11071 | 20.109 |
| Unknown | [Similar to: 4H-1-Benzopyran-4-one, 6-β-D-glucopyranosyl-2,3-dihydro-5,7-dihydroxy-2-(4-hydroxyphenyl)-, (S)-; ΔMass: -85.9951 Da]                                                                                       | Predicted | 97   | Full match | 519.10914 | 520.11642 | 20.107 |
| Unknown | [Similar to: (+/-)-12(13)-DiHOME; ΔMass: -205.8764 Da]                                                                                                                                                                   | Predicted | 96.6 | Full match | 519.11485 | 520.12212 | 19.986 |
| Unknown | [Similar to: 4H-1-Benzopyran-4-one, 6-β-D-glucopyranosyl-2,3-dihydro-5,7-dihydroxy-2-(4-hydroxyphenyl)-, (S)-; ΔMass: -86.0008 Da]                                                                                       | Predicted | 81.7 | Full match | 519.11485 | 520.12212 | 18.816 |
| Unknown | [Similar to: Disperse red 1; ΔMass: -205.9843 Da]                                                                                                                                                                        | Predicted | 61.8 | Full match | 519.11491 | 520.12218 | 21.743 |



|         |                                                                                                                                                                                                                           |           |      |            |           |           |        |
|---------|---------------------------------------------------------------------------------------------------------------------------------------------------------------------------------------------------------------------------|-----------|------|------------|-----------|-----------|--------|
| Unknown | [Similar to: 2-((4-[4-(2,4-dimethoxy-6-methylbenzoyloxy)-2-methyl-6-(((2S,3R,4S,5S,6R)-3,4,5-trihydroxy-6-(hydroxymethyl)oxan-2-yl)oxy]benzoyloxy)-2-hydroxy-6-methylphenyl]formamido)propanoic acid; ΔMass: 207.8768 Da] | Predicted | 72.7 | Full match | 520.34284 | 521.35011 | 47.913 |
| Unknown | [Similar to: (9Z,12Z)-6,8-Dihydroxy-9,12-octadecadienoic acid; ΔMass: -210.0297 Da]                                                                                                                                       | Predicted | 66.3 | Full match | 521.25253 | 522.25981 | 40.866 |
| Unknown | [Similar to: Tauroolithocholic acid 3-sulfate; ΔMass: 33.0007 Da]                                                                                                                                                         | Predicted | 60.9 | Full match | 529.25072 | 530.258   | 22.176 |
| Unknown | [Similar to: cis-7-Hexadecenoic acid; ΔMass: -276.2068 Da]                                                                                                                                                                | Predicted | 69.4 | Full match | 529.42408 | 530.43135 | 49.964 |
| Unknown | [Similar to: Ascorbyl palmitate; ΔMass: -120.2026 Da]                                                                                                                                                                     | Predicted | 97.5 | Full match | 533.45712 | 534.4644  | 51.503 |
| Unknown | [Similar to: (+/-)12(13)-DiHOME; ΔMass: -221.8714 Da]                                                                                                                                                                     | Predicted | 69.9 | Full match | 535.10984 | 536.11711 | 18.529 |
| Unknown | [Similar to: 4-((2S,3S,4S)-4-[4-(β-D-Glucopyranosyloxy)-3-methoxybenzyl]-3-(hydroxymethyl)tetrahydro-2-furanyl]-2-methoxyphenyl β-D-glucopyranoside; ΔMass: 148.1458 Da]                                                  | Predicted | 75.4 | Full match | 535.10984 | 536.11711 | 19.386 |
| Unknown | [Similar to: 3-[2-(1,3-Benzodioxol-5-yl)-7-methoxy-1-benzofuran-5-yl]-3-hydroxypropyl hexopyranoside; ΔMass: -35.9829 Da]                                                                                                 | Predicted | 94   | Full match | 540.3546  | 540.14607 | 1.786  |
| Unknown | [Similar to: (2R,3E)-5-(3-Chloro-5-formyl-2,6-dihydroxy-4-methylphenyl)-3-methyl-1-[(1S,2R,6R)-1,2,6-trimethyl-3-oxocyclohexyl]-3-penten-2-yl acetate; ΔMass: -77.9078 Da]                                                | Predicted | 60   | Full match | 541.09709 | 542.10437 | 20.129 |
| Unknown | [Similar to: (3β,5ξ,9ξ,18ξ)-28-Hydroxy-28-oxoolean-12-en-3-yl 6-deoxy-α-L-mannopyranosyl-(1->3)-[β-D-glucopyranosyl-(1->2)]-β-D-glucopyranosiduronic acid; ΔMass: 397.1256 Da]                                            | Predicted | 85.6 | Full match | 542.37025 | 543.37752 | 47.625 |
| Unknown | [Similar to: (3β,6α,9ξ,12β,20Z)-3,12-Dihydroxydammar-20(22),24-dien-6-yl 2-O-(6-deoxy-α-L-mannopyranosyl)-β-D-glucopyranoside; ΔMass: 221.0934 Da]                                                                        | Predicted | 69.6 | Full match | 544.38603 | 545.3933  | 48.982 |
| Unknown | [Similar to: 3'-Dephosphocoenzyme A; ΔMass: 141.0120 Da]                                                                                                                                                                  | Predicted | 79.6 | Full match | 545.12963 | 546.1369  | 15.276 |
| Unknown | [Similar to: 3'-Dephosphocoenzyme A; ΔMass: 141.0110 Da]                                                                                                                                                                  | Predicted | 67   | Full match | 545.13061 | 546.13788 | 24.473 |
| Unknown | [Similar to: Flavin adenine dinucleotide (FAD); ΔMass: 235.0617 Da]                                                                                                                                                       | Predicted | 78.3 | Full match | 549.08819 | 550.09546 | 9.458  |
| Unknown | [Similar to: ADB-PINACA; ΔMass: -205.9118 Da]                                                                                                                                                                             | Predicted | 75.4 | Full match | 549.1257  | 550.13298 | 19.854 |
| Unknown | [Similar to: (9Z,12Z)-6,8-Dihydroxy-9,12-octadecadienoic acid; ΔMass: -238.2300 Da]                                                                                                                                       | Predicted | 78.4 | Full match | 549.4528  | 550.46008 | 56.115 |
| Unknown | [Similar to: (4R,9β,23E)-2-(β-D-Glucopyranosyloxy)-16,20-dihydroxy-9,10,14-trimethyl-1,11,22-trioxo-4,9-cyclo-9,10-secocholesta-2,5,23-trien-25-yl acetate; ΔMass: 161.9949 Da]                                           | Predicted | 60.9 | Full match | 555.35423 | 556.36151 | 35.501 |
| Unknown | [Similar to: 17-Octadecynoic acid; ΔMass: -276.2070 Da]                                                                                                                                                                   | Predicted | 63.2 | Full match | 555.43993 | 556.44721 | 50.737 |
| Unknown | [Similar to: (1S)-1,5-Anhydro-2-O-(6-deoxy-α-L-mannopyranosyl)-1-[5,7-dihydroxy-2-(4-hydroxyphenyl)-4-oxo-4H-chromen-6-yl]-D-glucitol; ΔMass: 14.0152 Da]                                                                 | Predicted | 80.3 | Full match | 563.14112 | 564.1484  | 23.768 |
| Unknown | [Similar to: (1S)-1,5-Anhydro-2-O-(6-deoxy-α-L-mannopyranosyl)-1-[5,7-dihydroxy-2-(4-hydroxyphenyl)-4-oxo-4H-chromen-6-yl]-D-glucitol; ΔMass: 14.0150 Da]                                                                 | Predicted | 80.3 | Full match | 563.14126 | 564.14853 | 23.896 |
| Unknown | [Similar to: L-Glutathione oxidized; ΔMass: 45.0208 Da]                                                                                                                                                                   | Predicted | 75.5 | Full match | 566.12385 | 567.13113 | 9.52   |
| Unknown | [Similar to: Phosphatidylinositol-1,2-dipalmitoyl; ΔMass: 238.2290 Da]                                                                                                                                                    | Predicted | 87.1 | Full match | 571.28954 | 572.29682 | 48.997 |
| Unknown | [Similar to: (9Z,12Z)-6,8-Dihydroxy-9,12-octadecadienoic acid; ΔMass: -260.2147 Da]                                                                                                                                       | Predicted | 75.5 | Full match | 571.43748 | 572.44476 | 53.649 |
| Unknown | [Similar to: Arachidoyl ethanolamide; ΔMass: -219.1154 Da]                                                                                                                                                                | Predicted | 63.7 | Full match | 573.45312 | 574.46039 | 54.843 |
| Unknown | [Similar to: 10-Nitrolinoleate; ΔMass: -253.2063 Da]                                                                                                                                                                      | Predicted | 98   | Full match | 577.42428 | 578.43156 | 49.55  |
| Unknown | [Similar to: (2R,3E)-5-(3-Chloro-5-formyl-2,6-dihydroxy-4-methylphenyl)-3-methyl-1-[(1S,2R,6R)-1,2,6-trimethyl-3-oxocyclohexyl]-3-penten-2-yl acetate; ΔMass: -115.0330 Da]                                               | Predicted | 69.7 | Full match | 578.22226 | 579.22954 | 12.045 |
| Unknown | [Similar to: 9-Nitrooleate; ΔMass: -255.2221 Da]                                                                                                                                                                          | Predicted | 96.6 | Full match | 581.45576 | 582.46304 | 50.688 |
| Unknown | [Similar to: Sorbitan monooleate; ΔMass: -158.1804 Da]                                                                                                                                                                    | Predicted | 98.1 | Full match | 585.4869  | 586.49418 | 51.852 |
| Unknown | [Similar to: 4a,7b-Dihydroxy-3-(hydroxymethyl)-9a-(isobutyryloxy)-1,1,6,8-tetramethyl-5-oxo-1a,1b,4,4a,5,7a,7b,8,9,9a-decahydro-1H-cyclopropa[3,4]benzo[1,2-E]azulen-9-yl (2E)-2-methyl-2-butenate; ΔMass: -75.9968 Da]   | Predicted | 70.8 | Full match | 591.26181 | 592.26909 | 52.316 |
| Unknown | [Similar to: 16-Acetoxy-3-[[hexopyranosyl-(1->6)hexopyranosyl-(1->4)-2,6-dideoxy-3-O-methylhexopyranosyl]oxy]-14-hydroxycard-20(22)-enolide; ΔMass: 307.0572 Da]                                                          | Predicted | 63.9 | Full match | 592.37097 | 593.37825 | 33.257 |
| Unknown | [Similar to: 16-Acetoxy-3-[[hexopyranosyl-(1->6)hexopyranosyl-(1->4)-2,6-dideoxy-3-O-methylhexopyranosyl]oxy]-14-hydroxycard-20(22)-enolide; ΔMass: 307.0571 Da]                                                          | Predicted | 63.1 | Full match | 592.37105 | 593.37833 | 33.699 |
| Unknown | [Similar to: 7-(Hydroxymethyl)-2,5a,11,11,13a-pentamethyl-3a,5a,6,8,12,13a,13b,13c-octahydrofuro[4,3,2-ij]pyrano[4',3':4,5]cyclohepta[1,2-f]isochromene-1,5,9,13(2H,11H)-tetrone; ΔMass: -149.9808 Da]                    | Predicted | 60.5 | Full match | 593.15193 | 594.1592  | 24.451 |
| Unknown | [Similar to: 2-Methoxyestradiol; ΔMass: -293.9503 Da]                                                                                                                                                                     | Predicted | 75.1 | Full match | 595.13126 | 596.13854 | 23.426 |
| Unknown | [Similar to: MEDICA 16; ΔMass: -256.1601 Da]                                                                                                                                                                              | Predicted | 91.4 | Full match | 597.42981 | 598.43708 | 50.688 |

|         |                                                                                                                                                                                                                          |           |      |            |            |            |        |
|---------|--------------------------------------------------------------------------------------------------------------------------------------------------------------------------------------------------------------------------|-----------|------|------------|------------|------------|--------|
| Unknown | [Similar to: 1-O-[(2 $\alpha$ ,3 $\beta$ ,5 $\xi$ ,9 $\xi$ ,18 $\xi$ ,19 $\alpha$ )-2,3,19,23-Tetrahydroxy-28-oxoolean-12-en-28-yl]- $\beta$ -D-glucopyranose; $\Delta$ Mass: 64.2609 Da]                                | Predicted | 84.9 | Full match | 601.12972  | 602.137    | 1.818  |
| Unknown | [Similar to: 1-O-[(2 $\alpha$ ,3 $\beta$ ,5 $\xi$ ,9 $\xi$ ,18 $\xi$ ,19 $\alpha$ )-2,3,19,23-Tetrahydroxy-28-oxoolean-12-en-28-yl]- $\beta$ -D-glucopyranose; $\Delta$ Mass: 64.2513 Da]                                | Predicted | 84.9 | Full match | 601.13932  | 602.1466   | 1.785  |
| Unknown | [Similar to: Atorvastatin; $\Delta$ Mass: -43.8961 Da]                                                                                                                                                                   | Predicted | 61.6 | Full match | 601.14187  | 602.14915  | 17.486 |
| Unknown | [Similar to: 1-O-(1,3,23,24,25-Pentahydroxy-28-oxo-9,19-cyclolanostan-28-yl)hexopyranose; $\Delta$ Mass: 82.1105 Da]                                                                                                     | Predicted | 78.3 | Full match | 601.29068  | 602.29795  | 38.404 |
| Unknown | [Similar to: cis-5,8,11,14,17-Eicosapentaenoic acid; $\Delta$ Mass: -300.2071 Da]                                                                                                                                        | Predicted | 71.7 | Full match | 601.42442  | 602.4317   | 49.474 |
| Unknown | [Similar to: Sorbitan monooleate; $\Delta$ Mass: -174.1545 Da]                                                                                                                                                           | Predicted | 87   | Full match | 601.461    | 602.46828  | 51.85  |
| Unknown | [Similar to: 5-[(1S,2R,4aR)-5-(Hydroxymethyl)-1,2,4a-trimethyl-1,2,3,4,4a,7,8,8a-octahydro-1-naphthalenyl]-3-methylpentanoic acid; $\Delta$ Mass: -284.2120 Da]                                                          | Predicted | 68.5 | Full match | 605.45556  | 606.46284  | 50.612 |
| Unknown | [Similar to: 13,14-Dihydro-15-keto Prostaglandin A2 ; $\Delta$ Mass: -276.2070 Da]                                                                                                                                       | Predicted | 64.8 | Full match | 609.41417  | 610.42145  | 44.25  |
| Unknown | [Similar to: Urushenol; $\Delta$ Mass: -296.1970 Da]                                                                                                                                                                     | Predicted | 63   | Full match | 613.44556  | 614.45283  | 45.559 |
| Unknown | [Similar to: Oleyl anilide; $\Delta$ Mass: -260.1844 Da]                                                                                                                                                                 | Predicted | 69.4 | Full match | 616.48031  | 617.48758  | 54.885 |
| Unknown | [Similar to: cis-5,8,11,14,17-Eicosapentaenoic acid; $\Delta$ Mass: -316.1812 Da]                                                                                                                                        | Predicted | 72.8 | Full match | 617.39851  | 618.40579  | 49.475 |
| Unknown | [Similar to: (9Z,12Z)-6,8-Dihydroxy-9,12-octadecadienoic acid; $\Delta$ Mass: 0.0000 Da]                                                                                                                                 | Predicted | 70.1 | Full match | 623.45353  | 312.2301   | 41.89  |
| Unknown | [Similar to: (+/-)-Gingerol; $\Delta$ Mass: -332.2123 Da]                                                                                                                                                                | Predicted | 72.2 | Full match | 625.38817  | 626.39544  | 44.264 |
| Unknown | [Similar to: 8(S)-Hydroxy-(5Z,9E,11Z,14Z)-eicosatetraenoic acid; $\Delta$ Mass: -306.1965 Da]                                                                                                                            | Predicted | 77.4 | Full match | 625.42441  | 626.43169  | 49.446 |
| Unknown | [Similar to: Scutellarioside II; $\Delta$ Mass: -120.0007 Da]                                                                                                                                                            | Predicted | 63.4 | Full match | 627.15147  | 628.15874  | 34.36  |
| Unknown | [Similar to: L-Glutathione oxidized; $\Delta$ Mass: -19.1265 Da]                                                                                                                                                         | Predicted | 91.6 | Full match | 629.45574  | 630.46302  | 50.539 |
| Unknown | [Similar to: L-Glutathione oxidized; $\Delta$ Mass: -19.1265 Da]                                                                                                                                                         | Predicted | 61.8 | Full match | 630.27118  | 631.27846  | 33.648 |
| Unknown | [Similar to: (2S,3Z,4S)-2-( $\beta$ -D-Glucopyranosyloxy)-3-(2-((2E)-3-(4-hydroxyphenyl)-2-propenyl)oxy)ethylidene)-4-(2-methoxy-2-oxoethyl)-3,4-dihydro-2H-pyran-5-Carbohydrateoxylic acid; $\Delta$ Mass: -79.8674 Da] | Predicted | 72.4 | Full match | 645.02372  | 646.031    | 19.658 |
| Unknown | [Similar to: Arachidonic acid; $\Delta$ Mass: -342.1966 Da]                                                                                                                                                              | Predicted | 85.4 | Full match | 645.42958  | 646.43686  | 50.55  |
| Unknown | [Similar to: R-Palmitoyl-(2-methyl) ethanolamide; $\Delta$ Mass: -354.0808 Da]                                                                                                                                           | Predicted | 63.1 | Full match | 666.37157  | 667.37885  | 46.157 |
| Unknown | [Similar to: Corchorifatty acid F; $\Delta$ Mass: -350.2078 Da]                                                                                                                                                          | Predicted | 67.1 | Full match | 669.42324  | 678.43278  | 35.665 |
| Unknown | [Similar to: 7-(Hydroxymethyl)-2,5a,11,11,13a-pentamethyl-3a,5a,6,8,12,13a,13b,13c-octahydrofuro[4,3,2-ij]pyrano[4',3':4,5]cyclohepta[1,2-f]isochromene-1,5,9,13(2H,11H)-tetrone; $\Delta$ Mass: 99.9583 Da]             | Predicted | 61.5 | Full match | 687.43339  | 344.22012  | 30.334 |
| Unknown | [Similar to: 6-Deoxy- $\alpha$ -L-mannopyranosyl-(1->3)-[ $\beta$ -D-glucopyranosyl-(1->6)]-1-O-[3,27-dihydroxy-27,28-dioxolup-20(29)-en-28-yl]- $\beta$ -D-glucopyranose; $\Delta$ Mass: 290.2750 Da]                   | Predicted | 83.8 | Full match | 701.19254  | 666.22311  | 1.987  |
| Unknown | [Similar to: 16-(Hexopyranosyloxy)-7-hydroxy-8,9-epoxypimaran-18-oic acid; $\Delta$ Mass: -191.8983 Da]                                                                                                                  | Predicted | 79   | Full match | 705.16884  | 706.17611  | 19.377 |
| Unknown | [Similar to: Xanthohumol; $\Delta$ Mass: -354.0442 Da]                                                                                                                                                                   | Predicted | 68.3 | Full match | 707.18392  | 708.19089  | 14.787 |
| Unknown | [Similar to: Scrophanoside I; $\Delta$ Mass: -43.9184 Da]                                                                                                                                                                | Predicted | 70.7 | Full match | 711.14272  | 712.15     | 18.634 |
| Unknown | [Similar to: (4R,9 $\beta$ ,23E)-2-( $\beta$ -D-Glucopyranosyloxy)-16,20-dihydroxy-9,10,14-trimethyl-1,11,22-trioxo-4,9-cyclo-9,10-secocholesta-2,5,23-trien-25-yl acetate; $\Delta$ Mass: -8.0304 Da]                   | Predicted | 70   | Full match | 725.37956  | 726.38684  | 50.379 |
| Unknown | [Similar to: 3-[[6-Deoxy-4-O-( $\beta$ -D-glucopyranosyl)- $\alpha$ -L-mannopyranosyl]oxy]-14,16-dihydroxy-19-oxocard-20(22)-enolide; $\Delta$ Mass: -23.8921 Da]                                                        | Predicted | 66.5 | Full match | 735.21528  | 736.22277  | 27.604 |
| Unknown | [Similar to: Crocin; $\Delta$ Mass: 236.2184 Da]                                                                                                                                                                         | Predicted | 61.6 | Full match | 739.15306  | 740.16034  | 21.774 |
| Unknown | [Similar to: 1-O-(1,3,23,24,25-Pentahydroxy-28-oxo-9,19-cyclolanostan-28-yl)hexopyranose; $\Delta$ Mass: -79.7826 Da]                                                                                                    | Predicted | 93.9 | Full match | 763.18384  | 764.19111  | 1.977  |
| Unknown | [Similar to: 1-O-(1,3,23,24,25-Pentahydroxy-28-oxo-9,19-cyclolanostan-28-yl)hexopyranose; $\Delta$ Mass: -79.7916 Da]                                                                                                    | Predicted | 93.9 | Full match | 763.19275  | 764.20003  | 1.978  |
| Unknown | [Similar to: 1-O-(1,3,23,24,25-Pentahydroxy-28-oxo-9,19-cyclolanostan-28-yl)hexopyranose; $\Delta$ Mass: -884.0905 Da]                                                                                                   | Predicted | 71.4 | Full match | 783.2422   | 1568.49896 | 2.293  |
| Unknown | [Similar to: (+/-)-12(13)-DiHOME; $\Delta$ Mass: -506.2899 Da]                                                                                                                                                           | Predicted | 64.4 | Full match | 819.52832  | 820.5356   | 58.131 |
| Unknown | [Similar to: (+/-)-12(13)-DiHOME; $\Delta$ Mass: -556.3776 Da]                                                                                                                                                           | Predicted | 62.1 | Full match | 869.61605  | 870.62332  | 49.639 |
| Unknown | [Similar to: 1-O-(1,3,23,24,25-Pentahydroxy-28-oxo-9,19-cyclolanostan-28-yl)hexopyranose; $\Delta$ Mass: -143.8678 Da]                                                                                                   | Predicted | 75.7 | Full match | 873.27442  | 828.27624  | 2.292  |
| Unknown | [Similar to: JWH 018 N-(5-hydroxypentyl) $\beta$ -D-Glucuronide; $\Delta$ Mass: -406.1897 Da]                                                                                                                            | Predicted | 84.6 | Full match | 938.38741  | 939.39469  | 10.68  |
| Unknown | [Similar to: (2S,2S,3R,3R)-7-( $\beta$ -D-Glucopyranosyloxy)-5,5'-dihydroxy-2,2'-bis(4-hydroxyphenyl)-4,4'-dioxo-3,3',4,4'-tetrahydro-2H,2H-3,3'-bichromen-7-yl $\beta$ -D-glucopyranoside; $\Delta$ Mass: -196.0023 Da] | Predicted | 82.8 | Full match | 1061.22192 | 1062.2292  | 20.111 |
| Unknown | [Similar to: Chlorogenic acid; $\Delta$ Mass: -162.0533 Da]                                                                                                                                                              | Predicted | 82.9 | Full match | 515.14112  | 516.1484   | 12.28  |
| Unknown | [Similar to: ((1R,2R)-2-((2Z)-5-(Hexopyranosyloxy)-2-penten-1-yl)-3-oxocyclopentyl)acetic acid; $\Delta$ Mass: 34.0782 Da]                                                                                               | Predicted | 74.5 | Full match | 353.08786  | 354.09513  | 16.507 |
| Unknown | [Similar to: [1-(3,4-dihydroxy-5-methoxyphenyl)-7-(3,4-dihydroxyphenyl)heptan-3-yl] acetate; $\Delta$ Mass: -145.9495 Da]                                                                                                | Predicted | 62.6 | Full match | 549.1257   | 550.13298  | 19.413 |
| Unknown | [Similar to: 4H-1-Benzopyran-4-one, 6- $\beta$ -D-glucopyranosyl-2,3-dihydro-5,7-dihydroxy-2-(4-hydroxyphenyl)-, (S)-; $\Delta$ Mass: -86.0008 Da]                                                                       | Predicted | 97   | Full match | 519.11485  | 520.12212  | 20.108 |
| Unknown | [Similar to: Corchorifatty acid F; $\Delta$ Mass: -116.0112 Da]                                                                                                                                                          | Predicted | 79.3 | Full match | 443.22885  | 444.23613  | 36.709 |

|         |                                                                                                                                                                                |           |      |            |           |           |        |
|---------|--------------------------------------------------------------------------------------------------------------------------------------------------------------------------------|-----------|------|------------|-----------|-----------|--------|
| Unknown | [Similar to: 7(S),17(S)-Dihydroxy-8(E),10(Z),13(Z),15(E),19(Z)-docosapentaenoic acid; ΔMass: -3.9256 Da]                                                                       | Predicted | 82   | Full match | 365.16404 | 366.17131 | 40.938 |
| Unknown | [Similar to: Calcitriol; ΔMass: 18.0620 Da]                                                                                                                                    | Predicted | 66   | Full match | 397.25974 | 398.26701 | 41.664 |
| Unknown | [Similar to: (3β,5ξ,9ξ,18ξ)-28-Hydroxy-28-oxoolean-12-en-3-yl 6-deoxy-α-L-mannopyranosyl-(1->3)-[β-D-glucopyranosyl-(1->2)]-β-D-glucopyranosiduronic acid; ΔMass: 399.1413 Da] | Predicted | 79.9 | Full match | 540.3546  | 541.36188 | 46.311 |
| Unknown | [Similar to: Geniposide; ΔMass: -168.1551 Da]                                                                                                                                  | Predicted | 62.6 | Full match | 555.28482 | 556.2921  | 48.726 |
| Unknown | [Similar to: Phosphatidylinositol-1,2-dipalmitoyl; ΔMass: 238.2290 Da]                                                                                                         | Predicted | 87.1 | Full match | 571.28954 | 572.29682 | 49.14  |
| Unknown | [Similar to: 10-Nitrolinoleate; ΔMass: -269.1801 Da]                                                                                                                           | Predicted | 91.6 | Full match | 593.39818 | 594.40545 | 49.549 |

**Table S5** Lipid abundance by subclass in *Sphagnum fallax*.

| <b>Lipid</b>         | <b>Replicate 1</b> | <b>Replicate 2</b> | <b>Replicate 3</b> |
|----------------------|--------------------|--------------------|--------------------|
| Cer(d18:0/24:0)      | 551621.25          | 176054.5313        | 117811.7969        |
| Cer(d18:1/24:0)      | 129682.5781        | 61852.17188        | 141658.8594        |
| Cer(d18:0/14:0)      | 199475.6406        | 35165.92578        | 14977.09082        |
| Cer(d18:0/15:0)      | 31480.85156        | 10464.02344        | 14666.90918        |
| Cer(d18:0/16:0(2OH)) | 38634.36328        | 7726.437988        | 22469.17578        |
| Cer(d18:0/16:0)      | 236248.25          | 57351.89844        | 65829.03906        |
| Cer(d18:0/22:0)      | 192208.8125        | 77780.20313        | 73600.53125        |
| Cer(d18:0/24:0)      | 413240.9063        | 127224.6406        | 173378.4688        |
| Cer(d18:1/16:0(2OH)) | 21994.33984        | 6297.563965        | 15976.78613        |
| Cer(d18:1/22:0(2OH)) | 801349.25          | 691499.875         | 958518             |
| Cer(d18:1/22:0)      | 180106.5469        | 143066.2344        | 361140.875         |
| Cer(d18:1/24:0(2OH)) | 2773811.25         | 2772395            | 2478581.5          |
| Cer(d18:1/24:0)      | 81180.35156        | 67203.88281        | 195748.2188        |
| Cer(d18:1/24:1(2OH)) | 490599.0938        | 380124.625         | 363215.625         |
| Cer(d18:1/26:0(2OH)) | 737931.5           | 616676.125         | 491106.5625        |
| Cer(d18:2/20:1)_A    | 277811.4688        | 256681.5           | 59686.45703        |
| Cer(d18:2/20:1)_B    | 61701.57813        | 49071.4375         | 27233.10938        |
| Cer(d19:1/17:1)      | 3689.587646        | 0                  | 0                  |
| Cer(d20:1/16:0)      | 24125.00781        | 8833.336914        | 19677.64453        |
| Cer(d20:1/17:0)      | 0                  | 0                  | 24318.30859        |
| HexCer(d18:2/16:1)   | 12727.6416         | 9898.819336        | 9786.994141        |
| HexCer(d18:2/20:1)   | 1269574.625        | 1159305.25         | 298324.2813        |
| HexCer(d18:2/22:1)   | 109129.7031        | 59024.09766        | 159549.8906        |
| PE_Cer(d34:1)        | 3578.196777        | 0                  | 4307.551758        |
| PE_Cer(d37:2)        | 4665.48584         | 7201.193848        | 4076.808838        |
| PE_Cer(d38:2)        | 13485.9248         | 8962.349609        | 34633.17578        |
| PA(16:0/18:1)        | 153271.8594        | 60186.79297        | 69406.92969        |
| PA(16:0/18:2)        | 899106.9375        | 93601.07813        | 69067.875          |
| PA(18:1/18:1)        | 218931.0938        | 166870.0625        | 278804.7813        |
| PA(18:2/18:2)        | 487293.1563        | 45298.38281        | 32929.16797        |

|                                             |             |             |             |
|---------------------------------------------|-------------|-------------|-------------|
| PC(0:0/16:0)                                | 79174.36719 | 94597.22656 | 92450.32031 |
| PC(0:0/18:1)_A                              | 60989.96484 | 47084.48438 | 103110.1953 |
| PC(0:0/18:1)_B                              | 175086      | 157349.3281 | 293992.5625 |
| PC(16:0/18:1)                               | 958793.3125 | 691093.8125 | 1733204.625 |
| PC(16:0/18:2);PC(16:1/18:1)                 | 760254.375  | 225697.2188 | 532901.625  |
| PC(16:0/18:3)                               | 102597.8984 | 20729.02734 | 46789.04688 |
| PC(16:1/18:1)                               | 1247147.875 | 405607.5    | 557069.5    |
| PC(17:0/18:1)                               | 106122.1875 | 59281.14063 | 253449.2188 |
| PC(17:1/19:1)                               | 645351.375  | 161024.9063 | 412633.6875 |
| PC(18:1/18:1)                               | 7492961.5   | 3548041.75  | 1.24E+07    |
| PC(18:1/18:2)                               | 549833.25   | 154005.9375 | 403780.0938 |
| PC(18:1/19:1)                               | 205794.1094 | 116597.3203 | 369571.2813 |
| PC(18:2/18:2);PC(18:1/18:3)                 | 286834.0313 | 55741.43359 | 198579.4688 |
| PC(18:2/18:3)                               | 48452.17578 | 7694.832031 | 45022.375   |
| PE(15:0/15:0)                               | 1152564     | 541980.0625 | 736320.75   |
| PE(15:0/15:1)                               | 191954.0938 | 58021.6875  | 111652.5078 |
| PE(15:0/16:0)_A                             | 195522.1406 | 44463.50391 | 33816.63672 |
| PE(15:0/16:0)_B                             | 128335.7578 | 63684.80078 | 159104.5313 |
| PE(15:0/16:0)_C                             | 357529.2813 | 182662.2344 | 367690.2188 |
| PE(15:0/16:1)                               | 694557.3125 | 463248.6563 | 1456643.5   |
| PE(15:0/17:0)                               | 485937.7188 | 169686.3125 | 582733      |
| PE(15:0/17:1)_A                             | 1113441     | 342576.6563 | 799126.125  |
| PE(15:0/17:1)_B;PE(16:0/16:1)               | 424990      | 247771.3125 | 671996.4375 |
| PE(15:0/18:1);PE(16:1/17:0);PE(16:0/17:1)_A | 681621.9375 | 292439.125  | 884362      |
| PE(16:0/17:1)_B                             | 275433.8125 | 167288.8125 | 475759.0313 |
| PE(16:0/18:1)                               | 722540.5625 | 397754.8438 | 1069861.25  |
| PE(16:0/18:2);PE(16:1/18:1)_B               | 1058336.125 | 199738.125  | 474414.75   |
| PE(16:1/16:1)_A                             | 255001.0781 | 171521.25   | 541963.8125 |
| PE(16:1/16:1)_B                             | 64376.54297 | 84595.21094 | 227813.5469 |
| PE(16:1/18:1)_A                             | 827744.8125 | 491601.3438 | 752219.6875 |
| PE(17:0/17:0)                               | 97602.65625 | 35148.74609 | 162644.7656 |
| PE(17:1/17:1)                               | 211851.1563 | 54315.85938 | 142262.0938 |
| PE(18:1/18:1)                               | 2188925.5   | 1917905.5   | 2182657.25  |

|                                   |             |             |             |
|-----------------------------------|-------------|-------------|-------------|
| PE(18:1/18:2)                     | 220071      | 51068.125   | 277174.0625 |
| PE(18:1/19:1)                     | 485867.125  | 187304.2031 | 309222.5938 |
| PG(15:0/15:0)                     | 214306.75   | 159534.5469 | 142874.6719 |
| PG(15:0/16:0)                     | 94125.77344 | 84276.20313 | 102879.2344 |
| PG(16:0/16:1)                     | 110121.5469 | 105538.1797 | 184770.0156 |
| PG(16:0/18:1)                     | 296796.5625 | 331004.8125 | 419390.5    |
| PG(16:1/16:1)                     | 32995.50781 | 30192.19336 | 72471       |
| PG(16:1/18:1)                     | 410991.25   | 194433.4688 | 495570.3125 |
| PG(18:1/18:1)                     | 1116097.125 | 1004116.188 | 2075775.375 |
| PI(15:0/15:0)                     | 480700.875  | 323361.3125 | 596154.3125 |
| PI(16:0/18:2)                     | 445517.0625 | 40812.01563 | 51941.71484 |
| DG(18:0/0/0/18:0)                 | 459858.0938 | 580958.6875 | 1064340.375 |
| DG(18:1/0/0/18:1)                 | 156323.8594 | 552198.1875 | 165284.4219 |
| DG(20:0/0/0/20:0)                 | 175129.8594 | 234890.4688 | 136396.9688 |
| DGDG(16:1/18:1)_A                 | 62260.30078 | 63052.16016 | 24887.37891 |
| DGDG(16:1/18:1)_B;DGDG(16:0/18:2) | 925102.1875 | 101395.4297 | 23368.58203 |
| DGDG(19:1/19:1)                   | 353478.75   | 98311.72656 | 227655.0625 |
| SQDG(16:0/18:1)                   | 77006.30469 | 511743.5938 | 63026.83594 |
| DGTSA(16:0/16:0)                  | 322148.6875 | 463897.7188 | 350988.375  |
| DGTSA(16:0/16:1)                  | 1905562     | 2124836.75  | 3125968.5   |
| DGTSA(16:0/18:1)                  | 2257745.25  | 4393849     | 839831.125  |
| DGTSA(16:0/18:2)                  | 643683.625  | 2129550     | 784985.8125 |
| DGTSA(16:0/18:3)                  | 82088.9375  | 291949.25   | 141327.2969 |
| DGTSA(16:1/16:1)                  | 208527.0313 | 333033.7188 | 1861389.625 |
| DGTSA(16:1/18:1)                  | 920083.75   | 944477.8125 | 1381702.375 |
| DGTSA(17:0/17:0)                  | 148680.5625 | 87825.48438 | 199475.4219 |
| DGTSA(18:1/18:1)                  | 4508082.5   | 3399777.75  | 1219671.125 |
| DGTSA(18:1/18:2)                  | 226123.2031 | 283795.5    | 125096.0547 |
| TG(15:0/16:0/16:0)                | 86656.86719 | 101385.0234 | 88599.46875 |
| TG(16:0/16:0/16:0)                | 283626.0938 | 346335.0625 | 211995.8906 |
| TG(16:0/16:0/18:0)                | 118180.3203 | 144605.5469 | 160464.8594 |
| TG(16:0/16:0/18:1)                | 85208.42969 | 128538.8359 | 131654.9844 |
| TG(16:0/16:1/18:1)                | 107476.8047 | 109270.2109 | 97742.09375 |

|                                            |             |             |             |
|--------------------------------------------|-------------|-------------|-------------|
| TG(16:0/18:0/18:0)                         | 136956.375  | 162519.8594 | 235497.7188 |
| TG(16:0/18:1/18:1)                         | 240592.9531 | 333269.4063 | 377987      |
| TG(16:0/18:2/18:2)                         | 194884.1719 | 111930.8125 | 140562.0469 |
| TG(16:1/16:1/16:1)                         | 18252.59766 | 18814.94531 | 637178      |
| TG(16:1/18:1/18:1);TG(16:0/18:1/18:2)      | 150963.6719 | 191053.5469 | 224747.7969 |
| TG(18:0/18:0/18:0)                         | 78839.85156 | 115665.6328 | 210080.2813 |
| TG(18:0/18:0/18:1)                         | 18854.88867 | 23620.41016 | 32193.37305 |
| TG(18:0/18:1/18:1)                         | 50106.56641 | 69163.21875 | 86787.14844 |
| TG(18:1/18:1/18:1)                         | 336842.5313 | 398117.2188 | 546538.625  |
| TG(18:1/18:1/18:2)                         | 200659.6406 | 157072.6719 | 234035.3906 |
| TG(18:2/18:2/18:2)                         | 210745.8125 | 87811.92188 | 102788.1484 |
| TG(54:5)                                   | 167253.4844 | 120994.4219 | 216986.8438 |
| CL(18:1/18:1/18:1/18:1)                    | 199009.5313 | 189486.2344 | 221818.2813 |
| MIPC(t18:0/24:0(2OH))                      | 213820.4531 | 311964.7813 | 232646.3906 |
| CoQ9                                       | 18375.65234 | 0           | 0           |
| Unknown_542.48_16.2_NL299,256,244_PI267    | 272688.3438 | 206178.0938 | 114733.2969 |
| Unknown_554.52_19.2_NL299,256,244_PI267    | 124063.9063 | 38263.65625 | 38489.14844 |
| Unknown_570.51_18.3_NL299,256,244,60_PI267 | 530704.125  | 158984.8906 | 181811.0469 |
| Unknown_598.54_20.5_NL299,256,244,60_PI267 | 730441.25   | 282262.125  | 478578.5938 |
| Unknown_610.58_22.6_NL299,256,244_PI267    | 431044.3125 | 320632.9063 | 324364.9063 |
| Unknown_624.59_23.1_NL299,256,244_PI267    | 127073.6953 | 90041.875   | 69598.67188 |
| Unknown_626.57_22.1_NL299,256,244_PI267    | 2249446     | 2100797.5   | 1062175.875 |
| Unknown_638.61_23.6_NL299,256,244_PI267    | 4270233.5   | 3490966     | 4392270     |
| Unknown_652.63_24.1_NL299,256,244_PI267    | 2481024.75  | 2909478.25  | 2029677.875 |
| Unknown_654.6_23.2_NL299,256,244_PI267     | 1.76E+07    | 1.63E+07    | 1.57E+07    |
| Unknown_654.6_23.6_NL299,256,244,60_PI267  | 246605.5469 | 218435.2344 | 131022.0234 |
| Unknown_664.62_23.6_NL299,256,244_PI267    | 433404.0625 | 352983.7188 | 109199.0781 |
| Unknown_666.64_24.5_NL299,256,244_PI267    | 1.12E+07    | 1.18E+07    | 1.01E+07    |
| Unknown_668.62_23.7_NL299,256,244_PI267    | 1.98E+07    | 2.10E+07    | 1.56E+07    |
| Unknown_680.62_23.2_NL299,256,244_PI267    | 1.85E+07    | 1.53E+07    | 8564022     |
| Unknown_680.66_24.9_NL299,256,244_PI267    | 1915274     | 2097513     | 1459173.375 |
| Unknown_682.63_24.2_NL299,256,244_PI267    | 7.12E+07    | 6.97E+07    | 4.40E+07    |
| Unknown_682.64_245_NL299,256,244,60_PI267  | 994880.6875 | 692066.3125 | 467151.125  |

|                                            |             |             |             |
|--------------------------------------------|-------------|-------------|-------------|
| Unknown_694.6_17.2_NL299,256,244_PI267     | 1702818     | 1500387.125 | 471619.125  |
| Unknown_694.64_23.7_NL299,256,244_PI267    | 1690376.25  | 1304834.875 | 693834      |
| Unknown_694.67_25.3_NL299,256,244_PI267    | 4629823     | 5038023     | 4504919     |
| Unknown_696.61_19.1_NL299,256,244_PI267    | 368649.2813 | 590767      | 103688.1094 |
| Unknown_696.62_16.7_NL299,256,244_PI267    | 1495866.25  | 1404209.625 | 330359.4375 |
| Unknown_696.62_17.9_NL299,256,244_PI267    | 124353.4141 | 144317.7969 | 74978.67969 |
| Unknown_696.65_24.6_NL299,256,244_PI267    | 2.10E+07    | 2.46E+07    | 1.51E+07    |
| Unknown_696.65_24.9_NL299,256,244,60_PI267 | 383381.375  | 304352.4688 | 126361.3672 |
| Unknown_698.63_17.8_NL299,256,244_PI267    | 222825.6094 | 228064.0469 | 135548.8906 |
| Unknown_708.65_24.1_NL299,256,244_PI267    | 725467.1875 | 517251.5    | 361226.3438 |
| Unknown_708.69_25.6_NL299,256,244_PI267    | 220780.6719 | 208638.3438 | 147545.7813 |
| Unknown_710.67_25.0_NL299,256,244_PI267    | 3.03E+07    | 3.04E+07    | 1.57E+07    |
| Unknown_710.67_25.3_NL299,256,244,60_PI267 | 1282018     | 620999.625  | 292329.1875 |
| Unknown_724.68_25.4_NL299,256,244_PI267;   | 2641066     | 4263953     | 1785345.375 |
| Unknown_724.68_25.3_NL299,256,244,60_PI267 |             |             |             |
| Unknown_738.7_25.7_NL299,256,244_PI267;    | 742626      | 1033843     | 585952.8125 |
| Unknown_738.7_25.7_NL299,256,244,60_PI267  |             |             |             |
| Unknown_748.72_25.9_NL299,256,244_PI267    | 130162.0781 | 58772.08594 | 91444.25781 |

---



**Table S6** Fungal metabolites identified through positive mode LC-FTICR-MS/MS and confirmed using predicted compositions (number/intensity of isotopes and fragments) and ChemSpider (mass).

| Formula                                          | Molecular Weight | DeltaMass [ppm] | Rank | # Matched Iso. | # Missed Iso. | # Matched Frag. | SFit [%]    | Pattern Cov. [%] | MS Cov. [%] | MSMS Cov. [%] | In ChemSpider |
|--------------------------------------------------|------------------|-----------------|------|----------------|---------------|-----------------|-------------|------------------|-------------|---------------|---------------|
| C <sub>28</sub> H <sub>42</sub> O                | 394.32357        | 0.31            | 1    | 3              | 0             | 6               | 78.23923465 | 99.07            | 95.8        | 0.98          | TRUE          |
| C <sub>28</sub> H <sub>44</sub> O                | 396.33922        | 0.18            | 1    | 3              | 0             | 11              | 86.86693875 | 99.05            | 100         | 46.99         | TRUE          |
| C <sub>23</sub> H <sub>32</sub> N <sub>4</sub> O | 380.25761        | -3.34           | 1    | 2              | 0             | 14              | 96.9904231  | 95.7             | 100         | 9.11          | TRUE          |

Sfit%: Spectral similarity score between theoretical and measured isotope pattern in %

Pattern Cov. [%]: matched intensity percentage of the theoretical pattern

MS Cov. [%]: matched intensity percentage of the relevant portion of the MS

MSMS Cov. [%]: matched intensity percentage of the MSMS scan

**Table S7** List of masses and formulas of the seventeen (15 masses + 2 isomers) antimicrobial compounds (starred) and first neighbor compounds.

| <b>Exact Mass</b> | <b>Formula</b>                                                 | <b>Class</b>  |
|-------------------|----------------------------------------------------------------|---------------|
| 193.0717374       | C <sub>6</sub> H <sub>12</sub> O <sub>4</sub> N <sub>2</sub>   | Amino Sugars  |
| 355.1246479       | C <sub>9</sub> H <sub>14</sub> O <sub>6</sub>                  | Amino Sugars  |
| 357.1038584       | C <sub>8</sub> H <sub>14</sub> O <sub>5</sub> N <sub>2</sub>   | Amino Sugars  |
| 379.067037        | C <sub>14</sub> H <sub>23</sub> O <sub>8</sub> N <sub>3</sub>  | Amino Sugars  |
| 387.0721166       | C <sub>13</sub> H <sub>21</sub> O <sub>9</sub> N <sub>3</sub>  | Amino Sugars  |
| 318.998362        | C <sub>18</sub> H <sub>35</sub> O <sub>10</sub> P <sub>1</sub> | Amino Sugars  |
| 192.059463        | C <sub>7</sub> H <sub>12</sub> O <sub>5</sub>                  | Carbohydrates |
| 205.0717849       | C <sub>6</sub> H <sub>10</sub> O <sub>6</sub>                  | Carbohydrates |
| 209.0666914       | C <sub>6</sub> H <sub>12</sub> O <sub>6</sub>                  | Carbohydrates |
| 235.0459365*      | C <sub>7</sub> H <sub>12</sub> O <sub>6</sub>                  | Carbohydrates |
| 239.0772359       | C <sub>6</sub> H <sub>12</sub> O <sub>6</sub>                  | Carbohydrates |
| 247.0571834       | C <sub>7</sub> H <sub>14</sub> O <sub>6</sub>                  | Carbohydrates |
| 313.1140401       | C <sub>8</sub> H <sub>14</sub> O <sub>6</sub>                  | Carbohydrates |
| 323.0984523       | C <sub>7</sub> H <sub>14</sub> O <sub>5</sub> N <sub>2</sub>   | Carbohydrates |
| 339.0933233       | C <sub>7</sub> H <sub>12</sub> O <sub>7</sub>                  | Carbohydrates |
| 343.1246379       | C <sub>7</sub> H <sub>14</sub> O <sub>7</sub>                  | Carbohydrates |
| 369.103871        | C <sub>8</sub> H <sub>12</sub> O <sub>7</sub>                  | Carbohydrates |
| 383.1195138       | C <sub>7</sub> H <sub>12</sub> O <sub>6</sub> N <sub>2</sub>   | Carbohydrates |
| 203.0349931       | C <sub>9</sub> H <sub>14</sub> O <sub>7</sub>                  | Carbohydrates |
| 205.0142593       | C <sub>8</sub> H <sub>14</sub> O <sub>6</sub> N <sub>2</sub>   | Carbohydrates |
| 219.0298863       | C <sub>8</sub> H <sub>12</sub> O <sub>8</sub>                  | Carbohydrates |
| 245.0455524       | C <sub>8</sub> H <sub>16</sub> O <sub>8</sub>                  | Carbohydrates |
| 271.0248137       | C <sub>8</sub> H <sub>12</sub> O <sub>7</sub> N <sub>2</sub>   | Carbohydrates |
| 299.0561325       | C <sub>9</sub> H <sub>14</sub> O <sub>7</sub> N <sub>2</sub>   | Carbohydrates |
| 369.0616315       | C <sub>10</sub> H <sub>16</sub> O <sub>7</sub> N <sub>2</sub>  | Carbohydrates |
| 371.0408193       | C <sub>9</sub> H <sub>16</sub> O <sub>8</sub> N <sub>2</sub>   | Carbohydrates |
| 183.0662848       | C <sub>11</sub> H <sub>19</sub> O <sub>8</sub> N <sub>1</sub>  | Carbohydrates |
| 195.0662804       | C <sub>11</sub> H <sub>18</sub> O <sub>9</sub>                 | Carbohydrates |

|              |                         |               |
|--------------|-------------------------|---------------|
| 207.0298975  | $C_{11}H_{22}O_9$       | Carbohydrates |
| 209.0455461  | $C_{10}H_{20}O_{10}$    | Carbohydrates |
| 267.0874026  | $C_{11}H_{22}O_{10}$    | Carbohydrates |
| 293.0666622  | $C_{12}H_{20}O_{10}$    | Carbohydrates |
| 309.0980221  | $C_{11}H_{20}O_{11}$    | Carbohydrates |
| 327.0721735  | $C_{12}H_{20}O_{11}$    | Carbohydrates |
| 335.0773203  | $C_{12}H_{22}O_{11}$    | Carbohydrates |
| 337.0564712  | $C_{11}H_{22}O_{11}$    | Carbohydrates |
| 341.0878559  | $C_{12}H_{24}O_{11}$    | Carbohydrates |
| 351.0721819  | $C_{13}H_{22}O_{11}$    | Carbohydrates |
| 357.2070672  | $C_{13}H_{24}O_{11}$    | Carbohydrates |
| 361.0564428  | $C_{12}H_{22}O_{12}$    | Carbohydrates |
| 371.0983501  | $C_{12}H_{24}O_{12}$    | Carbohydrates |
| 407.0983238  | $C_{13}H_{22}O_{12}$    | Carbohydrates |
| 461.1089064  | $C_{14}H_{24}O_{12}$    | Carbohydrates |
| 475.1244481  | $C_{14}H_{21}O_{10}N_3$ | Carbohydrates |
| 503.0830073  | $C_{14}H_{22}O_{13}$    | Carbohydrates |
| 827.2671467  | $C_{15}H_{28}O_{15}S_1$ | Carbohydrates |
| 315.0933154  | $C_{18}H_{32}O_{16}$    | Carbohydrates |
| 285.1707195  | $C_{18}H_{32}O_{17}$    | Carbohydrates |
| 217.0717494* | $C_9H_6O_3$             | Aromatics     |
| 293.0878748  | $C_{11}H_8O_4$          | Aromatics     |
| 297.1191396  | $C_{10}H_6O_5$          | Aromatics     |
| 359.1194858  | $C_{11}H_8O_5$          | Aromatics     |
| 519.15653    | $C_{13}H_{10}O_4$       | Aromatics     |
| 257.0455802  | $C_{13}H_{10}O_5$       | Aromatics     |
| 269.045561   | $C_{12}H_8O_6$          | Aromatics     |
| 297.0405054  | $C_{14}H_{10}O_5$       | Aromatics     |
| 327.0510648* | $C_{15}H_{10}O_5$       | Aromatics     |
| 331.0459969  | $C_{14}H_8O_6$          | Aromatics     |
| 574.1070897  | $C_{15}H_8O_6$          | Aromatics     |

|              |                      |           |
|--------------|----------------------|-----------|
| 163.0400496  | $C_{16}H_{12}O_5$    | Aromatics |
| 175.0400777* | $C_{15}H_{10}O_6$    | Aromatics |
| 179.0349601  | $C_{14}H_{10}O_6$    | Aromatics |
| 199.0611913  | $C_{16}H_{10}O_6$    | Aromatics |
| 207.0662803  | $C_{16}H_{12}O_6$    | Aromatics |
| 209.0819518  | $C_{15}H_{10}O_7$    | Aromatics |
| 247.0612297  | $C_{17}H_{12}O_6$    | Aromatics |
| 251.0561448  | $C_{16}H_{10}O_7$    | Aromatics |
| 269.0666579* | $C_{16}H_{12}O_7$    | Aromatics |
| 302.1478995  | $C_{17}H_{12}O_7$    | Aromatics |
| 309.1092268  | $C_{16}H_{10}O_8$    | Aromatics |
| 313.0718048  | $C_{16}H_{12}O_8$    | Aromatics |
| 331.1915793  | $C_{18}H_{14}O_7$    | Aromatics |
| 354.0911508  | $C_{18}H_{12}O_8$    | Aromatics |
| 359.077319   | $C_{18}H_{14}O_8$    | Aromatics |
| 401.0878887  | $C_{19}H_{14}O_8$    | Aromatics |
| 409.077594   | $C_{18}H_{12}O_9$    | Aromatics |
| 227.2016733  | $C_{33}H_{10}O_1$    | Aromatics |
| 189.0404665  | $C_{29}H_{22}O_{12}$ | Aromatics |
| 360.1412213* | $C_9H_8O_3$          | Lignins   |
| 175.061179   | $C_9H_{10}O_3$       | Lignins   |
| 177.0404262  | $C_8H_8O_4$          | Lignins   |
| 191.0560821  | $C_{10}H_8O_3$       | Lignins   |
| 205.0829773  | $C_{10}H_{10}O_3$    | Lignins   |
| 207.0510129  | $C_9H_8O_4$          | Lignins   |
| 219.0510213* | $C_9H_{10}O_4$       | Lignins   |
| 219.062255   | $C_9H_{12}O_4$       | Lignins   |
| 233.0779251  | $C_{10}H_8O_4$       | Lignins   |
| 261.0728216  | $C_{10}H_{12}O_4$    | Lignins   |
| 275.0884432  | $C_9H_{10}O_5$       | Lignins   |
| 279.0834093  | $C_9H_{12}O_5$       | Lignins   |

|             |                      |         |
|-------------|----------------------|---------|
| 299.0983773 | $C_{11}H_{10}O_4$    | Lignins |
| 327.0933048 | $C_{10}H_8O_5$       | Lignins |
| 341.1088999 | $C_{11}H_{12}O_4$    | Lignins |
| 342.1123127 | $C_{10}H_{10}O_5$    | Lignins |
| 353.1089677 | $C_{11}H_{14}O_4$    | Lignins |
| 390.1153927 | $C_{11}H_{10}O_5$    | Lignins |
| 397.0988421 | $C_{11}H_{12}O_5$    | Lignins |
| 479.1075776 | $C_{10}H_{10}O_6$    | Lignins |
| 229.050651  | $C_{11}H_{10}O_6$    | Lignins |
| 283.0248291 | $C_{13}H_{12}O_5$    | Lignins |
| 283.0612712 | $C_{12}H_{10}O_6$    | Lignins |
| 285.0404745 | $C_{12}H_{12}O_6$    | Lignins |
| 301.03541   | $C_{13}H_{12}O_6$    | Lignins |
| 311.0561328 | $C_{13}H_{14}O_6$    | Lignins |
| 313.0353808 | $C_{12}H_{12}O_7$    | Lignins |
| 315.0510932 | $C_{13}H_{16}O_6$    | Lignins |
| 329.0303897 | $C_{12}H_{14}O_7$    | Lignins |
| 341.0666935 | $C_{15}H_{12}O_5$    | Lignins |
| 355.0459238 | $C_{15}H_{14}O_5$    | Lignins |
| 357.0615844 | $C_{14}H_{12}O_6$    | Lignins |
| 165.05568   | $C_{13}H_{16}O_7$    | Lignins |
| 181.0506155 | $C_{15}H_{12}O_6$    | Lignins |
| 191.0349845 | $C_{14}H_{14}O_7$    | Lignins |
| 197.0455407 | $C_{14}H_{16}O_7$    | Lignins |
| 205.0506365 | $C_{14}H_{18}O_7$    | Lignins |
| 221.0455607 | $C_{17}H_{22}O_4$    | Lignins |
| 223.0612106 | $C_{15}H_{12}O_7$    | Lignins |
| 225.0405016 | $C_{15}H_{18}O_7$    | Lignins |
| 237.0404961 | $C_{14}H_{18}O_6N_2$ | Lignins |
| 249.0404684 | $C_{14}H_{16}O_8$    | Lignins |
| 263.0561463 | $C_{17}H_{14}O_6$    | Lignins |

|              |                      |         |
|--------------|----------------------|---------|
| 267.051049   | $C_{14}H_{18}O_8$    | Lignins |
| 271.0611897  | $C_{17}H_{16}O_6$    | Lignins |
| 275.0561235  | $C_{16}H_{14}O_7$    | Lignins |
| 287.0561049  | $C_{15}H_{16}O_8$    | Lignins |
| 295.0823535  | $C_{14}H_{14}O_9$    | Lignins |
| 297.098032   | $C_{15}H_{18}O_8$    | Lignins |
| 303.0510091  | $C_{14}H_{16}O_9$    | Lignins |
| 311.0772526  | $C_{20}H_{26}O_4$    | Lignins |
| 313.0929523  | $C_{20}H_{28}O_4$    | Lignins |
| 315.0874357  | $C_{16}H_{14}O_8$    | Lignins |
| 317.0666768  | $C_{16}H_{16}O_8$    | Lignins |
| 323.0772615  | $C_{15}H_{14}O_9$    | Lignins |
| 325.0565305  | $C_{16}H_{18}O_8$    | Lignins |
| 325.0928479  | $C_{15}H_{16}O_9$    | Lignins |
| 333.0615915* | $C_{15}H_{18}O_9$    | Lignins |
| 337.0929568  | $C_{18}H_{16}O_7$    | Lignins |
| 339.0722318  | $C_{15}H_{20}O_9$    | Lignins |
| 343.0823144  | $C_{17}H_{14}O_8$    | Lignins |
| 343.103509   | $C_{16}H_{16}O_9$    | Lignins |
| 345.0616158* | $C_{16}H_{18}O_9$    | Lignins |
| 353.0878437  | $C_{15}H_{18}O_9$    | Lignins |
| 355.1035213  | $C_{16}H_{20}O_9$    | Lignins |
| 361.0928905* | $C_{22}H_{30}O_4$    | Lignins |
| 367.1035379* | $C_{18}H_{16}O_8$    | Lignins |
| 375.0722177  | $C_{17}H_{16}O_8$    | Lignins |
| 381.0828243  | $C_{17}H_{14}O_9$    | Lignins |
| 381.119072   | $C_{18}H_{18}O_8$    | Lignins |
| 391.1034161  | $C_{17}H_{16}O_9$    | Lignins |
| 397.0776512  | $C_{17}H_{20}O_9$    | Lignins |
| 403.1035078  | $C_{16}H_{18}O_{10}$ | Lignins |
| 417.0826889  | $C_{16}H_{20}O_{10}$ | Lignins |

|              |                      |         |
|--------------|----------------------|---------|
| 431.0982753  | $C_{18}H_{16}O_9$    | Lignins |
| 447.0931667  | $C_{17}H_{16}O_{10}$ | Lignins |
| 448.0965079  | $C_{17}H_{18}O_{10}$ | Lignins |
| 461.0724226  | $C_{18}H_{22}O_9$    | Lignins |
| 463.0882186  | $C_{20}H_{18}O_8$    | Lignins |
| 464.0914359  | $C_{19}H_{16}O_9$    | Lignins |
| 477.1038163  | $C_{19}H_{20}O_9$    | Lignins |
| 479.0829786  | $C_{17}H_{18}O_{11}$ | Lignins |
| 521.1299802  | $C_{20}H_{18}O_9$    | Lignins |
| 535.1091738  | $C_{20}H_{20}O_9$    | Lignins |
| 535.2547352  | $C_{19}H_{20}O_{10}$ | Lignins |
| 609.1460064  | $C_{18}H_{18}O_{11}$ | Lignins |
| 697.3076282  | $C_{20}H_{18}O_{10}$ | Lignins |
| 421.0754282  | $C_{21}H_{18}O_{10}$ | Lignins |
| 159.0106407  | $C_{21}H_{20}O_{10}$ | Lignins |
| 230.9823526  | $C_{20}H_{18}O_{11}$ | Lignins |
| 389.1313623  | $C_{21}H_{18}O_{11}$ | Lignins |
| 389.1677707* | $C_{21}H_{20}O_{11}$ | Lignins |
| 427.1091875  | $C_{20}H_{20}O_{11}$ | Lignins |
| 443.1404231  | $C_{21}H_{18}O_{12}$ | Lignins |
| 449.1087029  | $C_{22}H_{22}O_{11}$ | Lignins |
| 473.1087691* | $C_{21}H_{20}O_{12}$ | Lignins |
| 489.1036046  | $C_{20}H_{20}O_{12}$ | Lignins |
| 491.1193323  | $C_{21}H_{22}O_{12}$ | Lignins |
| 517.1408667  | $C_{22}H_{20}O_{12}$ | Lignins |
| 549.1248049  | $C_{23}H_{24}O_{11}$ | Lignins |
| 625.1407534  | $C_{22}H_{22}O_{12}$ | Lignins |
| 633.1716422  | $C_{21}H_{20}O_{13}$ | Lignins |
| 165.0404723  | $C_{23}H_{20}O_{13}$ | Lignins |
| 361.2231692  | $C_{24}H_{26}O_{13}$ | Lignins |
| 374.15687    | $C_{28}H_{38}O_{10}$ | Lignins |

|              |                         |         |
|--------------|-------------------------|---------|
| 375.2025083  | $C_{24}H_{24}O_{14}$    | Lignins |
| 447.1516988  | $C_{28}H_{40}O_{10}$    | Lignins |
| 243.0622831  | $C_{27}H_{30}O_{16}$    | Lignins |
| 376.0997395  | $C_{34}H_{50}O_{15}$    | Lignins |
| 292.1037929* | $C_{12}H_{24}O_2$       | Lipids  |
| 503.1616699  | $C_{14}H_{28}O_2$       | Lipids  |
| 286.0438533  | $C_{16}H_{32}O_2$       | Lipids  |
| 167.034971*  | $C_{18}H_{36}O_2$       | Lipids  |
| 255.2329955  | $C_{16}H_{26}O_3N_2S_4$ | Lipids  |
| 175.0724223  |                         | None    |
| 161.0244221  |                         | None    |
| 421.065647   |                         | None    |
| 283.0823445  |                         | None    |
| 363.0721933  |                         | None    |
| 465.103834   |                         | None    |
| 475.0880989  |                         | None    |
| 199.1703505  |                         | None    |
| 283.2643036  |                         | None    |
| 282.0844094  |                         | None    |
| 358.210548   |                         | None    |
| 435.093153   |                         | None    |
| 505.0985727  |                         | None    |
| 163.0248118  |                         | None    |
| 165.0404263  |                         | None    |
| 341.0391213  |                         | None    |
| 403.0646847  |                         | None    |
| 173.0455304  |                         | None    |
| 357.0827356  |                         | None    |
| 359.0984298  |                         | None    |
| 503.1405556  |                         | None    |
| 217.0829966  | $C_5H_8O_6$             | Other   |



|             |                         |          |
|-------------|-------------------------|----------|
| 362.1205088 | $C_5H_{10}O_6$          | Other    |
| 441.1894954 | $C_5H_{10}O_6$          | Other    |
| 265.071753  | $C_{10}H_{18}O_{11}$    | Other    |
| 273.0768461 | $C_{10}H_{20}O_{11}$    | Other    |
| 329.1758675 | $C_9H_{15}O_{10}N_2P_1$ | Other    |
| 533.2392795 | $C_{12}H_{21}O_{13}P_1$ | Other    |
| 177.0557188 | $C_{15}H_{26}O_5$       | Proteins |
| 385.0929013 | $C_{18}H_{34}O_7$       | Proteins |
| 429.0826718 | $C_{15}H_{25}O_8N_3$    | Proteins |
| 433.0775173 | $C_{18}H_{32}O_8$       | Proteins |
| 419.0750533 | $C_{20}H_{32}O_7S_2$    | Proteins |
| 179.0560924 | $C_7H_{10}O_5$          | Tannins  |
| 233.0666842 | $C_7H_{10}O_6$          | Tannins  |
| 247.024836  | $C_9H_{12}O_6N_2$       | Tannins  |
| 360.0806097 | $C_{15}H_{18}O_{10}$    | Tannins  |
| 369.0827806 | $C_{15}H_{20}O_{10}$    | Tannins  |
| 445.0775595 | $C_{13}H_{19}O_{10}N_3$ | Tannins  |
| 313.0776887 | $C_{21}H_{28}O_{14}$    | Tannins  |

---
